# Supplementary material for: Vlasoulides A and B, a pair of neuroprotective C32 dimeric sesquiterpenes with a hexacyclic 5/7/5/5/(5)/7 carbon skeleton from the roots of Vladimiria souliei
Source: Royal Society of Chemistry journal article supplement (doi:10.1039/d1ra00075f), 2021-01-01
Supplement: d1ra00075f1.pdf [file d1ra00075f1.pdf]

## Supporting Information

### **Vlasoulides A and B, a pair of neuroprotective C<sub>32</sub> dimeric sesquiterpenes with hexacyclic 5/7/5/5/(5)/7 carbon skeleton from the roots of *Vladimiria souliei***

Zhi-li Wu <sup>a,b</sup>, Qun Wang <sup>b</sup>, Lu Fu <sup>b</sup>, Ri-xin Su <sup>b</sup>, Ze-shi Sun <sup>b</sup>, Hui-liang Li <sup>a,b</sup> \*

#### **Affiliation**

<sup>a</sup> School of Traditional Chinese Pharmacy, China Pharmaceutical University, Nanjing, Jiangsu 211198, P.R. China

<sup>b</sup> School of Pharmacy, Second Military Medical University, Shanghai 200433, P.R. China

#### **Contents**

|                                                                                                                                                        |    |
|--------------------------------------------------------------------------------------------------------------------------------------------------------|----|
| Table S1. $^1\text{H}$ NMR (500 MHz, $\text{CDCl}_3$ ) in Hz) and $^{13}\text{C}$ NMR (125 MHz, $\text{CDCl}_3$ ) Spectroscopic Data for 1 and 2 ..... | 4  |
| Isolation Procedures .....                                                                                                                             | 6  |
| Compound characterization of 1–2.....                                                                                                                  | 7  |
| ( <i>R</i> )-and ( <i>S</i> )-MTPA Esters of compounds 1 and 2.....                                                                                    | 7  |
| Neuroprotection Assay .....                                                                                                                            | 8  |
| Figure S1. HRESIMS spectrum of <i>Vlasoulide A</i> (1) .....                                                                                           | 9  |
| Figure S2. IR spectrum of <i>Vlasoulide A</i> (1) .....                                                                                                | 10 |
| Figure S3. OR Value of <i>Vlasoulide A</i> (1) in $\text{CH}_3\text{OH}$ .....                                                                         | 11 |
| Figure S4. CD Value of <i>Vlasoulide A</i> (1) in $\text{CH}_3\text{OH}$ .....                                                                         | 12 |
| Figure S5. UV spectrum of <i>Vlasoulide A</i> (1) in $\text{CH}_3\text{CN}/\text{H}_2\text{O}$ .....                                                   | 13 |
| Figure S6. $^1\text{H}$ - NMR spectrum of <i>Vlasoulide A</i> (1) in $\text{CDCl}_3$ .....                                                             | 14 |
| Figure S7. $^{13}\text{C}$ NMR spectrum of <i>Vlasoulide A</i> (1) in $\text{CDCl}_3$ .....                                                            | 15 |
| Figure S8. DEPT-135 NMR spectrum of <i>Vlasoulide A</i> (1) in $\text{CDCl}_3$ .....                                                                   | 16 |
| Figure S9. $^1\text{H}$ - $^1\text{H}$ COSY spectrum of <i>Vlasoulide A</i> (1) in $\text{CDCl}_3$ .....                                               | 17 |
| Figure S10. HSQC spectrum of <i>Vlasoulide A</i> (1) in $\text{CDCl}_3$ .....                                                                          | 18 |
| Figure S11. HMBC spectrum of <i>Vlasoulide A</i> (1) in $\text{CDCl}_3$ .....                                                                          | 19 |
| Figure S12. NOESY spectrum of <i>Vlasoulide A</i> (1) in $\text{CDCl}_3$ .....                                                                         | 20 |
| Figure S13. HRESIMS spectrum of <i>Vlasoulide B</i> (2).....                                                                                           | 21 |
| Figure S14. IR spectrum of <i>Vlasoulide B</i> (2).....                                                                                                | 22 |
| Figure S15. OR Value of <i>Vlasoulide B</i> (2) in $\text{CH}_3\text{OH}$ .....                                                                        | 23 |
| Figure S16. CD Value of <i>Vlasoulide B</i> (2) in $\text{CH}_3\text{OH}$ .....                                                                        | 24 |
| Figure S17. UV spectrum of <i>Vlasoulide B</i> (2) in $\text{CH}_3\text{CN}/\text{H}_2\text{O}$ .....                                                  | 25 |
| Figure S18. $^1\text{H}$ NMR spectrum of <i>Vlasoulide B</i> (2) in $\text{CDCl}_3$ .....                                                              | 26 |
| Figure S19. $^{13}\text{C}$ NMR spectrum of <i>Vlasoulide B</i> (2) in $\text{CDCl}_3$ .....                                                           | 27 |
| Figure S20. DEPT-135 NMR spectrum of <i>Vlasoulide B</i> (2) in $\text{CDCl}_3$ .....                                                                  | 28 |
| Figure S21. $^1\text{H}$ - $^1\text{H}$ COSY spectrum of <i>Vlasoulide B</i> (2) in $\text{CDCl}_3$ .....                                              | 29 |
| Figure S22. HSQC spectrum of <i>Vlasoulide B</i> (2) in $\text{CDCl}_3$ .....                                                                          | 30 |
| Figure S23. HMBC spectrum of <i>Vlasoulide B</i> (2) in $\text{CDCl}_3$ .....                                                                          | 31 |
| Figure S24. NOESY spectrum of <i>Vlasoulide B</i> (2) in $\text{CDCl}_3$ .....                                                                         | 32 |

Figure S25. (*R*) and (*S*)-MTPA Esters of compound 1. ....33

Figure S26. (*R*) and (*S*)-MTPA Esters of compound 2. ....34

**Table S1.** <sup>1</sup>H NMR (600 MHz CDCl<sub>3</sub> *J* in Hz) and <sup>13</sup>C NMR (150 MHz, CDCl<sub>3</sub>)

**Spectroscopic Data for 1 and 2**

| Position | 1 <sup>a</sup>                             |                     | 2 <sup>a</sup>                             |                     |
|----------|--------------------------------------------|---------------------|--------------------------------------------|---------------------|
|          | $\delta_{\text{H}}$ mult ( <i>J</i> in Hz) | $\delta_{\text{C}}$ | $\delta_{\text{H}}$ mult ( <i>J</i> in Hz) | $\delta_{\text{C}}$ |
|          |                                            |                     |                                            |                     |

|    |                                     |       |                                   |       |
|----|-------------------------------------|-------|-----------------------------------|-------|
| 1  | 2.96, m                             | 44.9  | 2.96, m                           | 44.8  |
| 2  | 2.20, 1.78, m                       | 29.3  | 2.20, 1.78, m                     | 29.3  |
| 3  | 2.24, 1.76, m                       | 35.8  | 2.24, 1.78, m                     | 35.7  |
| 4  |                                     | 54.3  |                                   | 54.2  |
| 5  | 2.78 <sup>c</sup> , dd (6.74, 6.52) | 54.1  | 2.77 <sup>c</sup> dd (6.65, 6.93) | 54.2  |
| 6  | 4.12, t (9.8)                       | 78.8  | 4.11, t (9.7)                     | 79.0  |
| 7  | 2.86 <sup>c</sup> , m               | 57.5  | 2.85 <sup>c</sup> , m             | 56.9  |
| 8  | 2.11, 1.50, m                       | 31.9  | 2.11, 1.51, m                     | 31.8  |
| 9  | 2.47, 2.15, m                       | 34.1  | 2.47, 2.12, m                     | 34.0  |
| 10 |                                     | 150.1 |                                   | 150.1 |
| 11 |                                     | 180.2 |                                   | 180.1 |
| 12 | 1.87, 1.43, m                       | 30.5  | 1.82, 1.45, m                     | 30.3  |
| 13 | 4.99, s, 4.81, s                    | 114.2 | 4.98, s, 4.80, s                  | 114.1 |
| 14 |                                     | 211.6 |                                   | 211.7 |
| 15 | 2.67, 2.66, d (8.5)                 | 50.5  | 2.63, 2.62, d (8.7)               | 51.6  |
| 16 | 4.24, m                             | 63.9  | 4.25, m                           | 63.5  |
| 17 | 1.21, d (6.3)                       | 22.5  | 1.20, d (6.4)                     | 22.2  |
| 1' | 2.89 <sup>c</sup> , m               | 47.4  | 2.88 <sup>c</sup> , m             | 47.4  |
| 2' | 1.96, 1.82, m                       | 30.0  | 1.97, 1.82, m                     | 30.0  |

|     |                                           |       |                                           |       |
|-----|-------------------------------------------|-------|-------------------------------------------|-------|
| 3'  | 2.55, 2.44, m                             | 32.2  | 2.55, 2.44, m                             | 32.2  |
| 4'  |                                           | 151.3 |                                           | 151.3 |
| 5'  | 2.74 <sup>c</sup>                         | 52.0  | 2.73 <sup>c</sup>                         | 51.9  |
| 6'  | 4.21, t (9.5)                             | 84.0  | 4.22, t (9.6)                             | 84.0  |
| 7'  | 2.09, m                                   | 48.7  | 2.07, m                                   | 48.7  |
| 8'  | 1.85 <sup>c</sup> , 1.64 <sup>c</sup> , m | 25.3  | 1.83 <sup>c</sup> , 1.64 <sup>c</sup> , m | 25.3  |
| 9'  | 2.49 <sup>c</sup> , 2.04 <sup>c</sup> , m | 36.0  | 2.49 <sup>c</sup> , 2.05 <sup>c</sup> , m | 36.0  |
| 10' |                                           | 149.6 |                                           | 149.6 |
| 11' |                                           | 76.7  |                                           | 76.7  |
| 12' |                                           | 176.8 |                                           | 176.8 |
| 13' | 1.81 <sup>c</sup> , 1.69 <sup>c</sup> , m | 30.8  | 1.81 <sup>c</sup> , 1.66 <sup>c</sup> , m | 30.9  |
| 14' | 4.89,s, 4.80, s                           | 112.2 | 4.89,s, 4.79, s                           | 112.2 |
| 15' | 5.19, d (0.8),<br>5.06, d (1.0)           | 109.7 | 5.19, d (1.1),<br>5.05, d (1.1)           | 109.7 |

---

<sup>a</sup> <sup>1</sup>H NMR Spectroscopic Data at 600 MHz and <sup>13</sup>C NMR Data at 150 MHz

## Materials and methods

**General experimental procedures.** Column chromatography (CC): silica gel H (10–40  $\mu\text{m}$ ; Marine Chemical Factory, Qingdao, P. R. China); MCI gel CHP-20P; Sephadex LH-20 (Pharmacia Fine Chemicals, Piscataway, NJ, USA); RP-C<sub>18</sub> gel (40–63  $\mu\text{m}$ ; Daiso, Co, Japan) were used for column chromatography. TLC: silica gel plates, visualization by spraying with 10 % H<sub>2</sub>SO<sub>4</sub> in EtOH and dragendorff's reagent. Semi-preparative HPLC: Agilent 1260 series with a Zorbax SB-C<sub>18</sub> (5  $\mu\text{m}$ , 9.4 mm  $\times$  25 cm) column. Melting point: X-4B apparatus and was uncorrected. IR spectra: Bruker Vector 22 (KBr pellets). Optical rotation: Autopol VI (serial No. 90079, manufactured by Rudolph Research Analytical, Hackettstown, NJ). UV spectra were obtained by the DAD detector of HPLC (Agilent 1260). NMR Spectra: Bruker Ascend-500 spectrometer (500 MHz);  $\delta$  in ppm with SiMe<sub>4</sub> as internal standard. MS: Agilent MSD-Trap-XCT (for ESI) and Q-ToF micro mass spectrometer (for HR-ESI).

**Plant Material.** The whole plants of *Vladimiria souliei* was collected at daJin, SiChuan province of China, in October, 2019, and authenticated by Prof. Bao-Kang Huang of Second Medical Military University. Currently A voucher specimen (No. 20191001) is deposited in School of Pharmacy, Second Military Medical University.

**Extraction and Isolation.** The dried and chipped roots of *V. souliei* (50.0 kg) were extracted by maceration with 95% ethanol overnight at room temperature (3  $\times$  60 L). After remove of solvent, the ethanol extract (5.60 kg) was partitioned between water and petroleum ether (PE)/ethyl acetate (EtOAc), successively, to give PE, EtOAc and water extracts. EtOAc extract (1.15 Kg) was segmented by MCI column chromatography (MeOH/H<sub>2</sub>O, 30:70 to 100:0) to give 8 fractions (Fr. 1-8). Fraction 5 (52.5 g) was further isolated by ODS column chromatography (MeOH/H<sub>2</sub>O, 30:70 to 90:10) to obtain 8 subfractions (Fr. 5.1-5.8). Subfraction 5.4 (5.5 g) was further purified by Sephadex LH-20 column chromatography (PE: EtOAc: MeOH, 10:10:1) to give 6 subfractions (Fr.

5.5.1-5.5.6). Subfraction 5.5.4 (252 mg) was purified by semi-preparative RP-C<sub>18</sub> HPLC (CH<sub>3</sub>CN/H<sub>2</sub>O, 70:30) to produce compounds **1** (7.2 mg) and **2** (6.5 mg). Above all, compounds **1** (7.2 mg) and **2** (6.5 mg) were obtained.

## Compound characterization of **1** and **2**

### *Vlasoulide A (1)*

White powder;  $[\alpha]_{25}^D$  -1.00 (c 0.08, CH<sub>3</sub>OH); UV (CH<sub>3</sub>CN/H<sub>2</sub>O)  $\lambda_{\max}$  210; IR (KBr)  $\nu_{\max}$  3438, 3079, 2933, 2869, 1770, 1710, 1639, 1448, 1382, 1351, 1268, 1222, 1153, 1272, 1020, 995, 896, cm<sup>-1</sup>; <sup>1</sup>H- and <sup>13</sup>C-NMR data (600 MHz/150 MHz), see Table S1; ESIMS  $m/z$  561.4 ([M+Na]<sup>+</sup>); positive HRESIMS  $m/z$  561.2828 ([M+Na]<sup>+</sup>, calcd 561.2823).

### *Vlasoulide B (2)*

White powder;  $[\alpha]_{25}^D$  0.00 (c 0.05, CH<sub>3</sub>OH); UV (CH<sub>3</sub>CN/H<sub>2</sub>O)  $\lambda_{\max}$  210; IR (KBr)  $\nu_{\max}$  3440, 3079, 2929, 2869, 1772, 1752, 1639, 1448, 1400, 1382, 1353, 1282, 1257, 1224, 1068, 1018, 995, 896 cm<sup>-1</sup>; <sup>1</sup>H- and <sup>13</sup>C-NMR data (600 MHz/150 MHz), see Table S1; ESIMS  $m/z$  561.5 ([M+Na]<sup>+</sup>); positive HRESIMS  $m/z$  561.2829 ([M+Na]<sup>+</sup>, calcd 561.2823).

## (*R*)-and (*S*)-MTPA Esters of compounds **1** and **2**

To each compounds **1** and **2** (each 1.5 mg) in pyridine-*d*<sub>5</sub> (130  $\mu$ L) was separately added (*R*)-(-)-MTPA (5  $\mu$ L) and (*S*)-(+)-MTPA (5  $\mu$ L) at room temperature, followed by stirring at 40°C for 8 h, and each reaction mixture was transferred into a 1.7 mm NMR tube.

### *(R)*-MTPA ester of **1**

<sup>1</sup>H NMR (pyridine-*d*<sub>5</sub>, 600MHz):  $\delta_H$  1.20 (3H, d, H<sub>3</sub>-17), 2.88 (1H, m H-15a), 2.91 (1H, m, H-15b),

4.30 (1H, t, H-6), 2.91 (1H, m, H-7), 2.21 (1H, m, H-8a), 1.58 (1H, m, H-8b).

*(S)*-MTPA ester of **1**

<sup>1</sup>H NMR (pyridine-d<sub>5</sub>, 600MHz): δ<sub>H</sub> 1.32 (3H, d, H<sub>3</sub>-17), 2.83 (1H, m H-15a), 2.85 (1H, m, H-15b),

4.20 (1H, t, H-6), 2.88 (1H, m, H-7), 2.19 (1H, m, H-8a) 1.56 (1H, m, H-8b).

*(R)*-MTPA ester of **2**

<sup>1</sup>H NMR (pyridine-d<sub>5</sub>, 600MHz): δ<sub>H</sub> 1.32 (3H, d, H<sub>3</sub>-17), 2.71 (1H, m H-15a), 2.74 (1H, m, H-15b),

4.21 (1H, t, H-6), 2.93 (1H, m, H-7), 2.14 (H, m, H-8a) 1.54 (1H, m, H-8b).

*(S)*-MTPA ester of **2**

<sup>1</sup>H NMR (pyridine-d<sub>5</sub>, 600MHz): δ<sub>H</sub> 1.22 (3H, d, H<sub>3</sub>-17), 2.77 (1H, m H-15a), 2.78 (1H, m, H-15b),

4.27 (1H, t, H-6), 2.98 (1H, m, H-7), 2.16 (1H, m, H-8a), 1.55 (1H, m, H-8b).

## Neuroprotection Assay

P-12 cells were seeded in 96-well culture plates at  $8 \times 10^3$  cells/mL at 37°C for 12 h. Then the cells were incubated with glutamate for an additional 24 h and drugs were pretreated for 1 h before treated with glutamate. Cell viability was determined by the cck8 assay, after treatment, 10 μL of cck8 were added to each well and incubated at 37°C for 4 h. The optical density (OD) was spectrophotometrically measured at 450 nm (cck8) using a microplate reader, respectively (BioTek Instruments, Inc.)



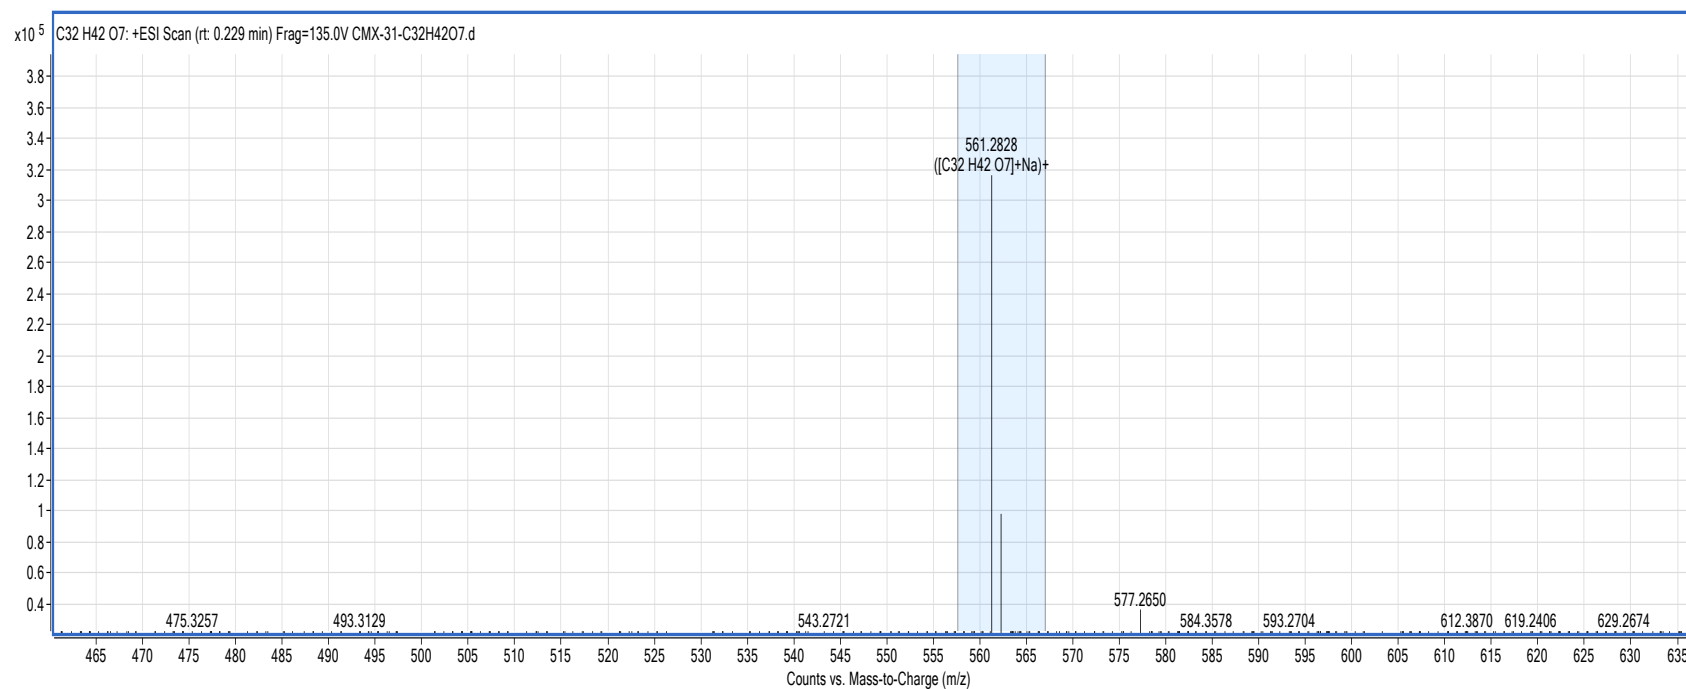

| Height (Calc) | Height Sum% (Calc) | Height % (Calc) | m/z (Calc) | Diff (mDa) | Height   | Height % | Height Sum % | m/z      |
|---------------|--------------------|-----------------|------------|------------|----------|----------|--------------|----------|
| 304244.4      | 69.4               | 100             | 561.2823   | -0.5       | 316121.1 | 100      | 72.1         | 561.2828 |

| Best | ID Source | Formula    | Mass (MFG) | Species | m/z      | Score | Diff (ppm) | Score (MFG) |
|------|-----------|------------|------------|---------|----------|-------|------------|-------------|
| TRUE | MFG       | C32 H42 O7 | 538.2931   | (M+Na)+ | 561.2828 | 96.74 | -0.76      | 96.74       |

Figure S1. HRESIMS spectrum of Vlasoulide A (1)

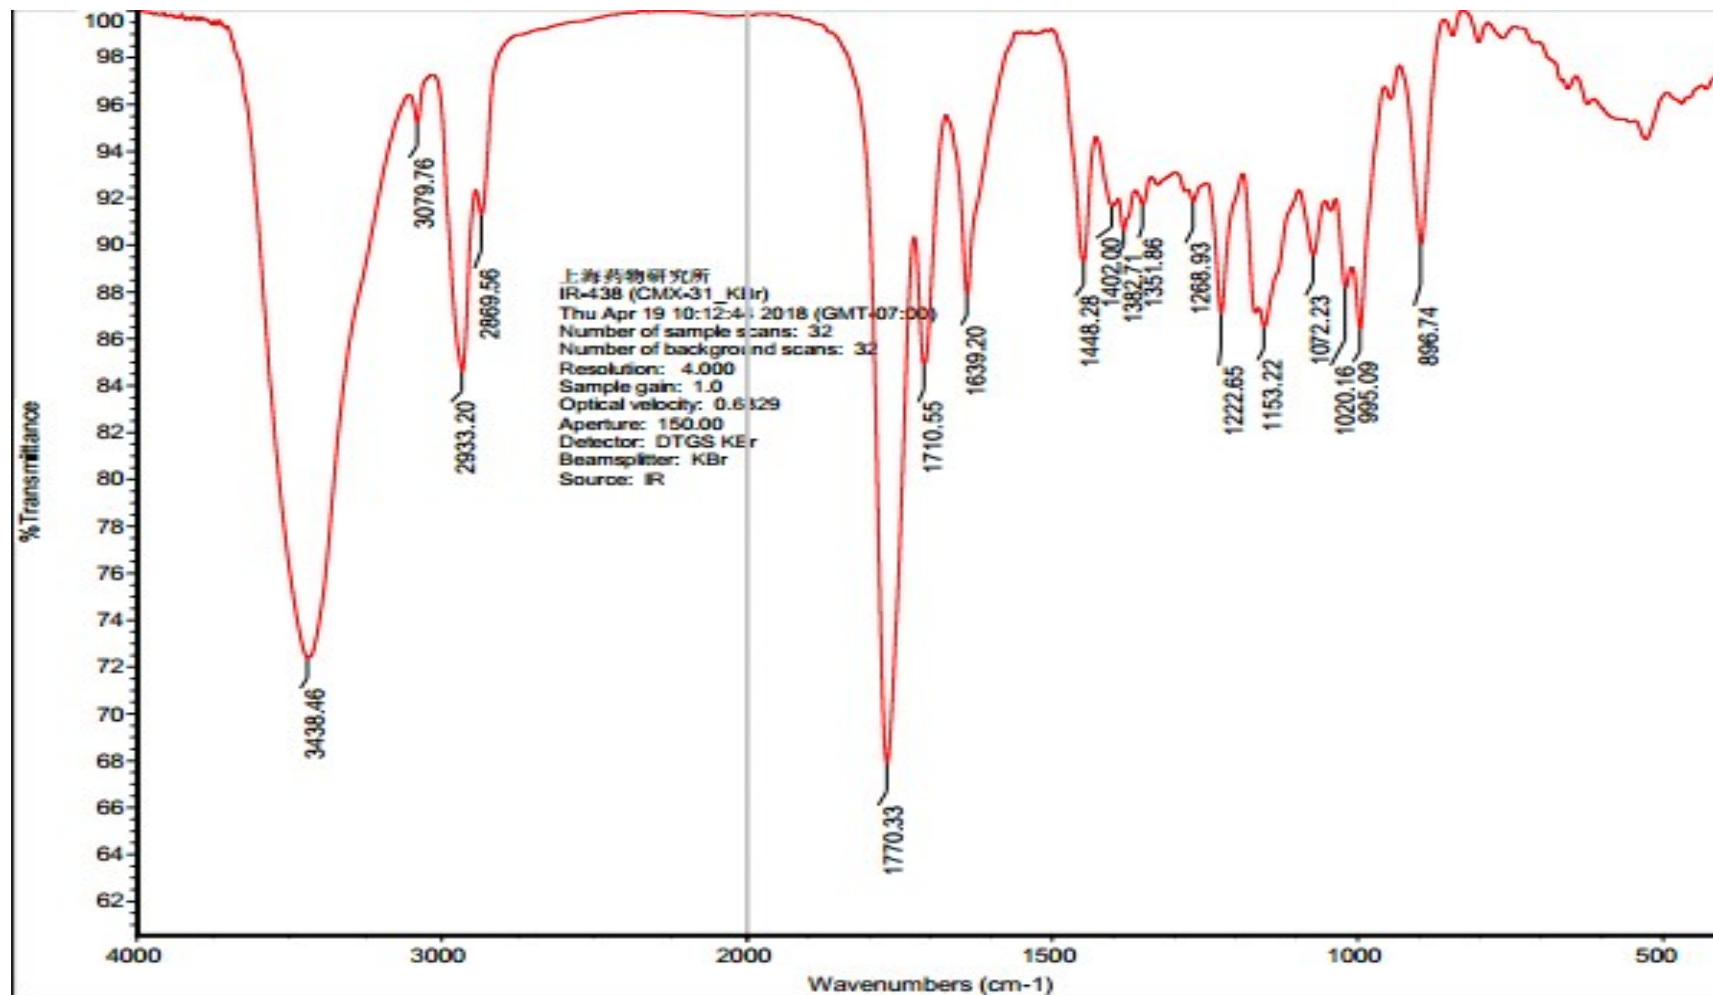

Figure S2. IR spectrum of Vlasoulide A (1)

**Rudolph Research Analytical**

Friday, 04/20/2018

This sample was measured on an Autopol VI, serial number 90079,  
manufactured by Rudolph Research Analytical, Hackettstown, NJ.

LotID : CMX-31  
Set Temperature : 20.0  
Temp Corr : OFF

|          |                |                 |                |                |
|----------|----------------|-----------------|----------------|----------------|
| <b>n</b> | <b>Average</b> | <b>Std.Dev.</b> | <b>Maximum</b> | <b>Minimum</b> |
| 6        | -1.000         | 1.0000          | 0.000          | -2.000         |

| S.No | Sample ID | Time        | Result | Scale | OR ° Arc | WLG | Lg.mm  | Conc. | Temp. | Comment |
|------|-----------|-------------|--------|-------|----------|-----|--------|-------|-------|---------|
| 1    | CMX-31    | 04:22:02 PM | 0.000  | SR    | 0.000    | 589 | 100.00 | 0.050 | 19.9  |         |
| 2    | CMX-31    | 04:22:10 PM | -2.000 | SR    | -0.001   | 589 | 100.00 | 0.050 | 19.9  |         |
| 3    | CMX-31    | 04:22:18 PM | -2.000 | SR    | -0.001   | 589 | 100.00 | 0.050 | 19.9  |         |
| 4    | CMX-31    | 04:22:28 PM | -2.000 | SR    | -0.001   | 589 | 100.00 | 0.050 | 19.9  |         |
| 5    | CMX-31    | 04:22:34 PM | 0.000  | SR    | 0.000    | 589 | 100.00 | 0.050 | 19.9  |         |
| 6    | CMX-31    | 04:22:43 PM | 0.000  | SR    | 0.000    | 589 | 100.00 | 0.050 | 19.9  |         |

\_\_\_\_\_  
Signature

**Figure S3. OR Value of Vlasoulide A (1) in CH<sub>3</sub>OH**

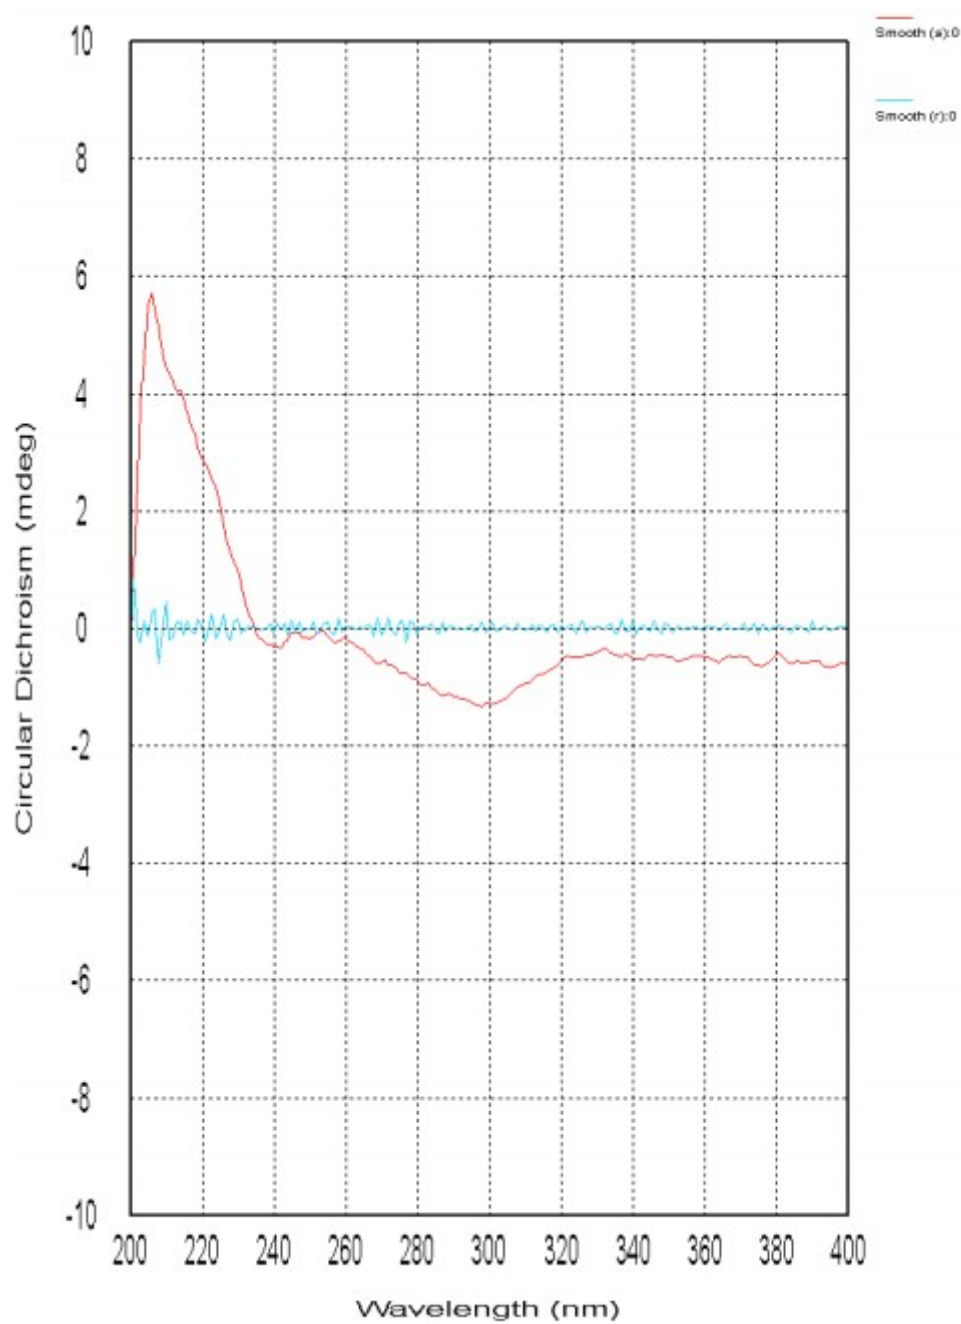

**Figure S4. CD Value of Vlasoulide A (1) in CH<sub>3</sub>OH**

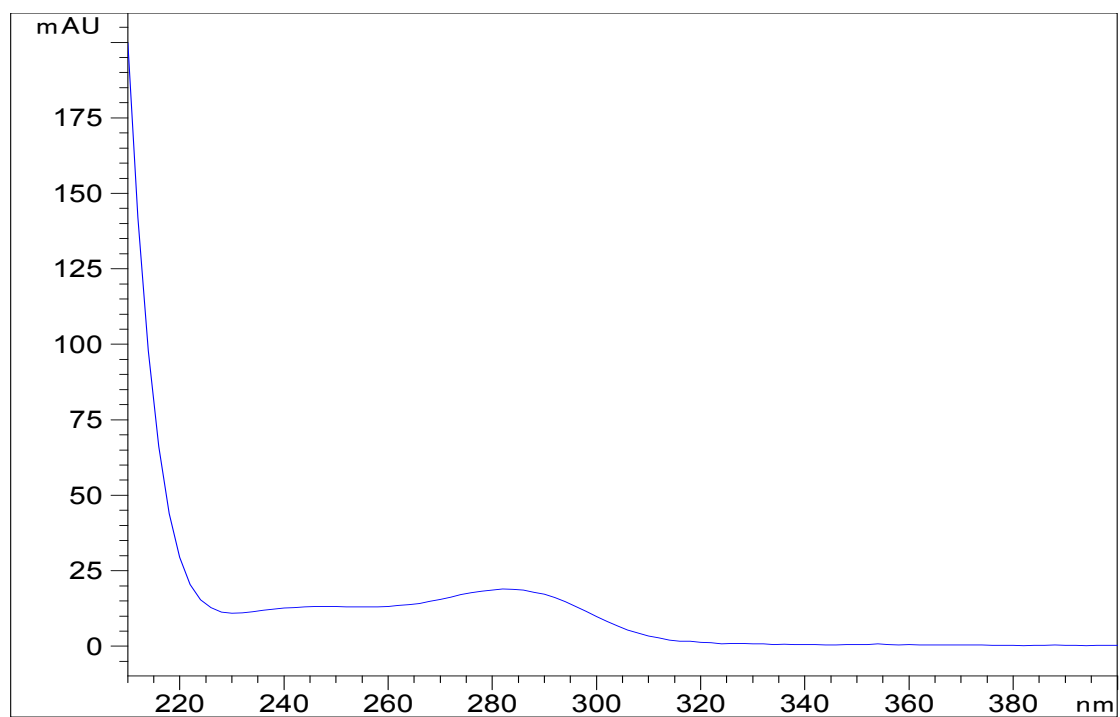

**Figure S5. UV spectrum of Vlasoulide A (1) in CH<sub>3</sub>CN/H<sub>2</sub>O**

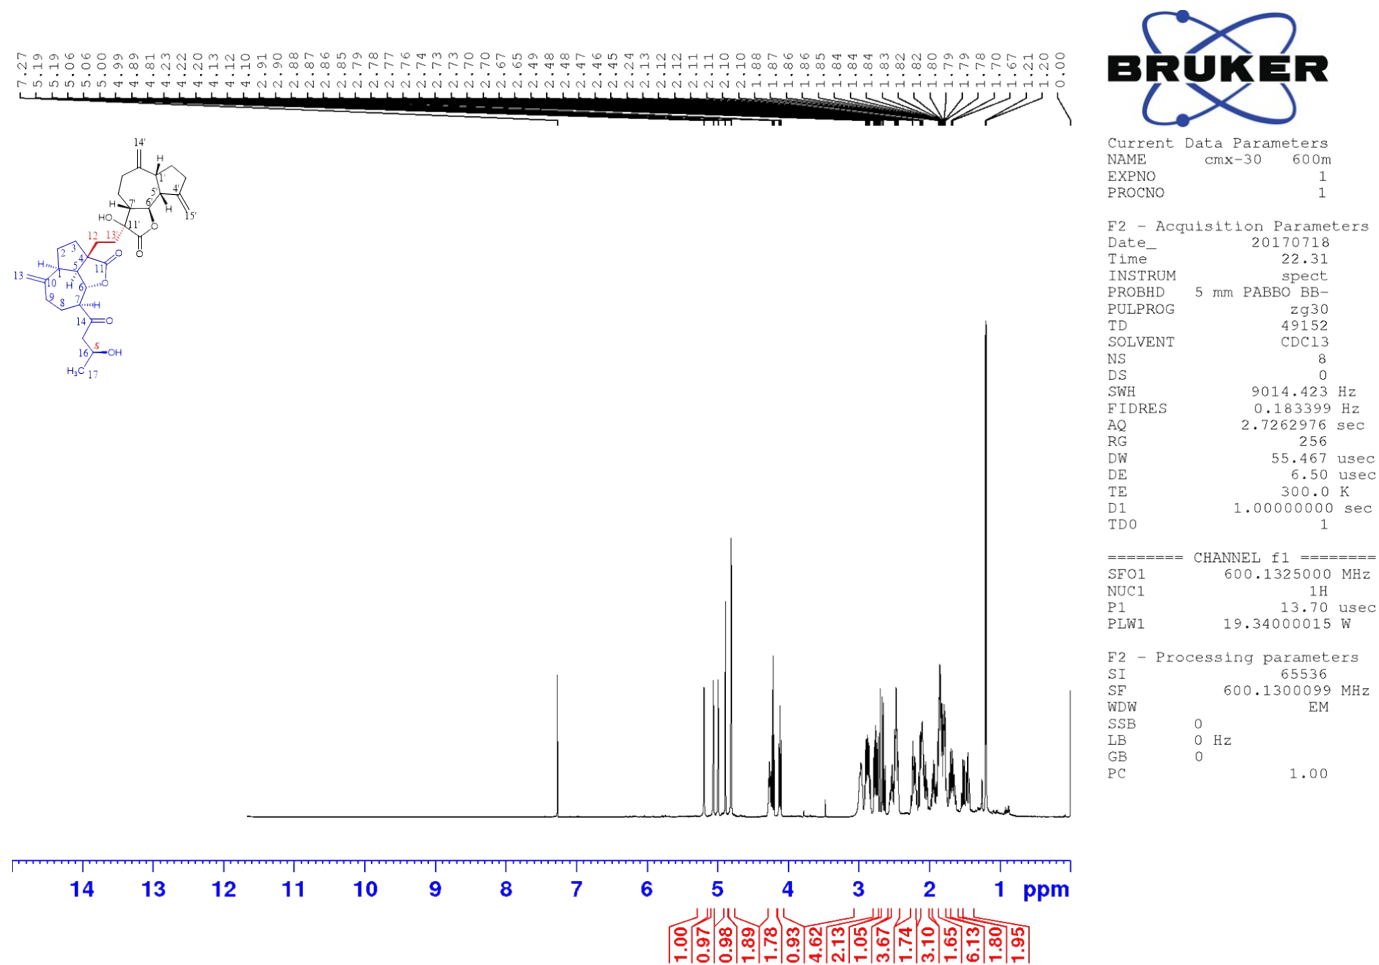

Figure S6. <sup>1</sup>H- NMR spectrum of Vlasoulide A (1) in CDCl<sub>3</sub>

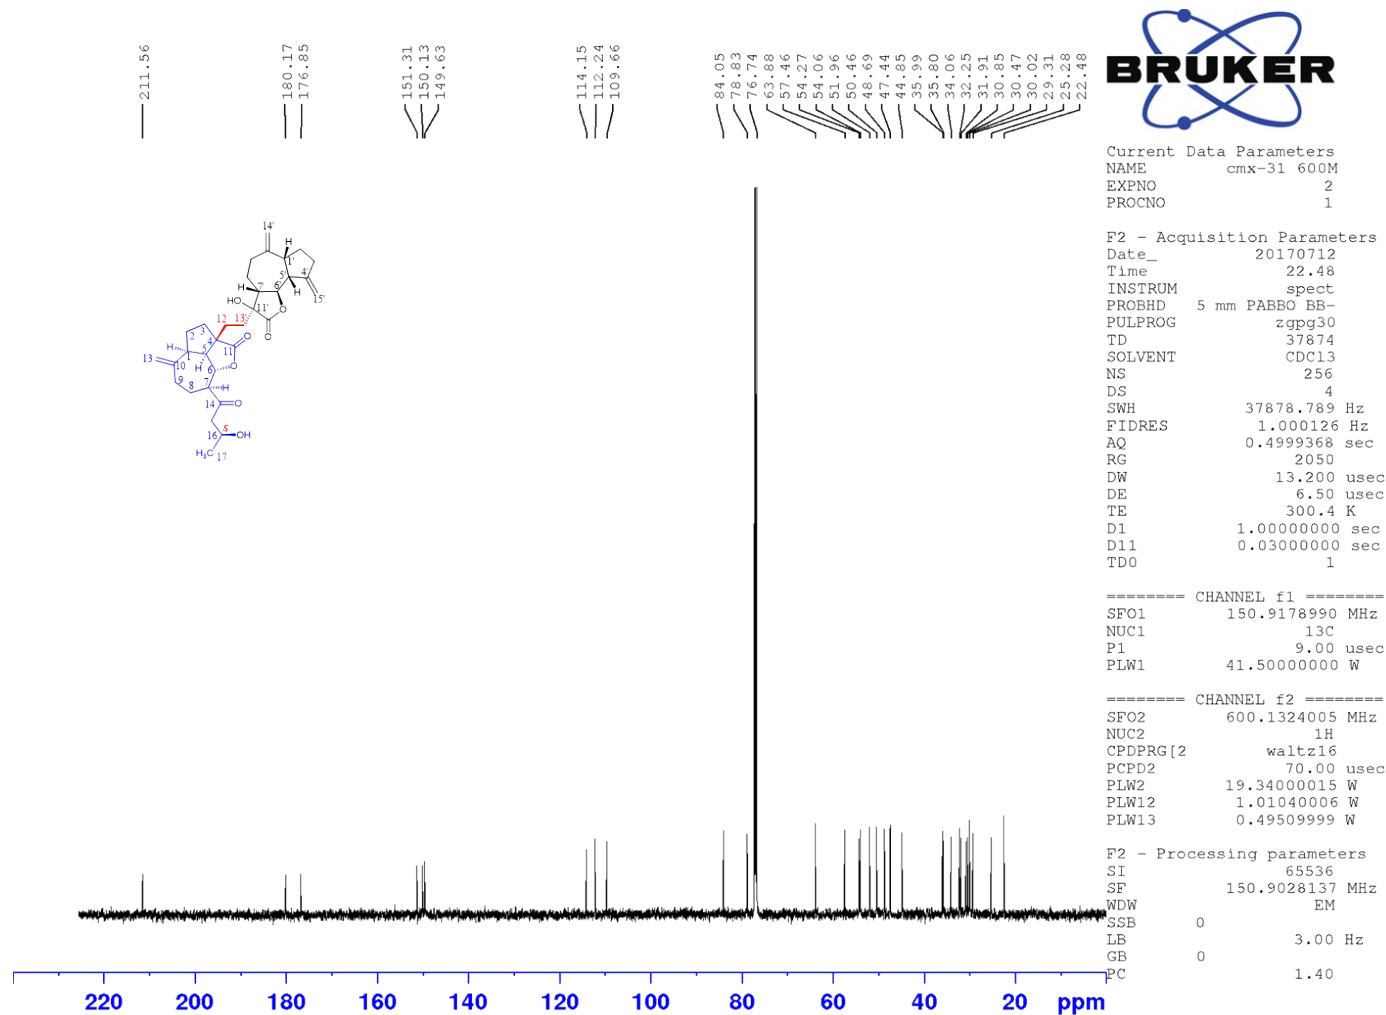

Figure S7. <sup>13</sup>C NMR spectrum of Vlasoulide A (1) in CDCl<sub>3</sub>

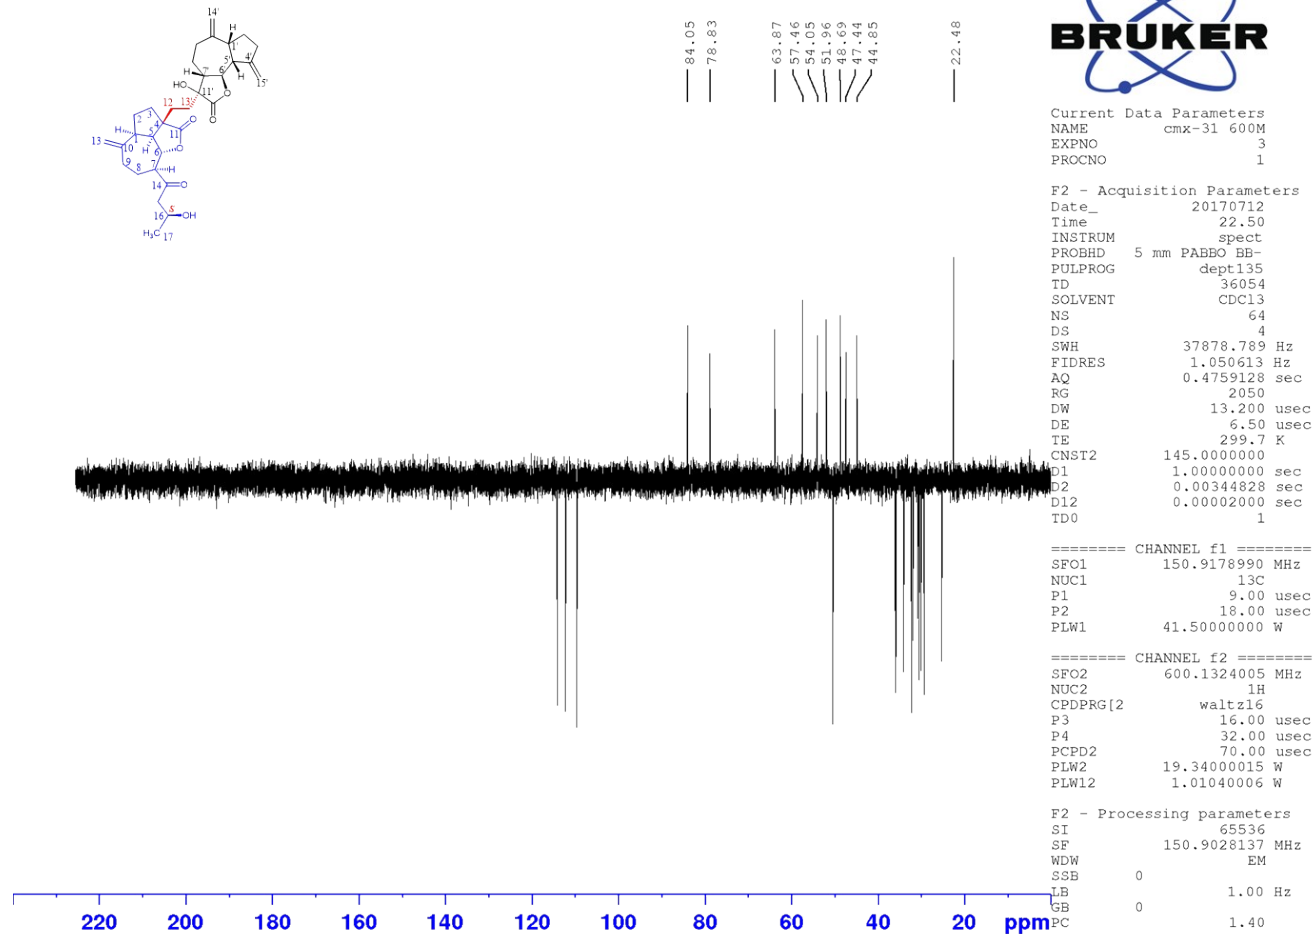

Figure S8. DEPT-135 NMR spectrum of Vlasoulide A (1) in CDCl<sub>3</sub>



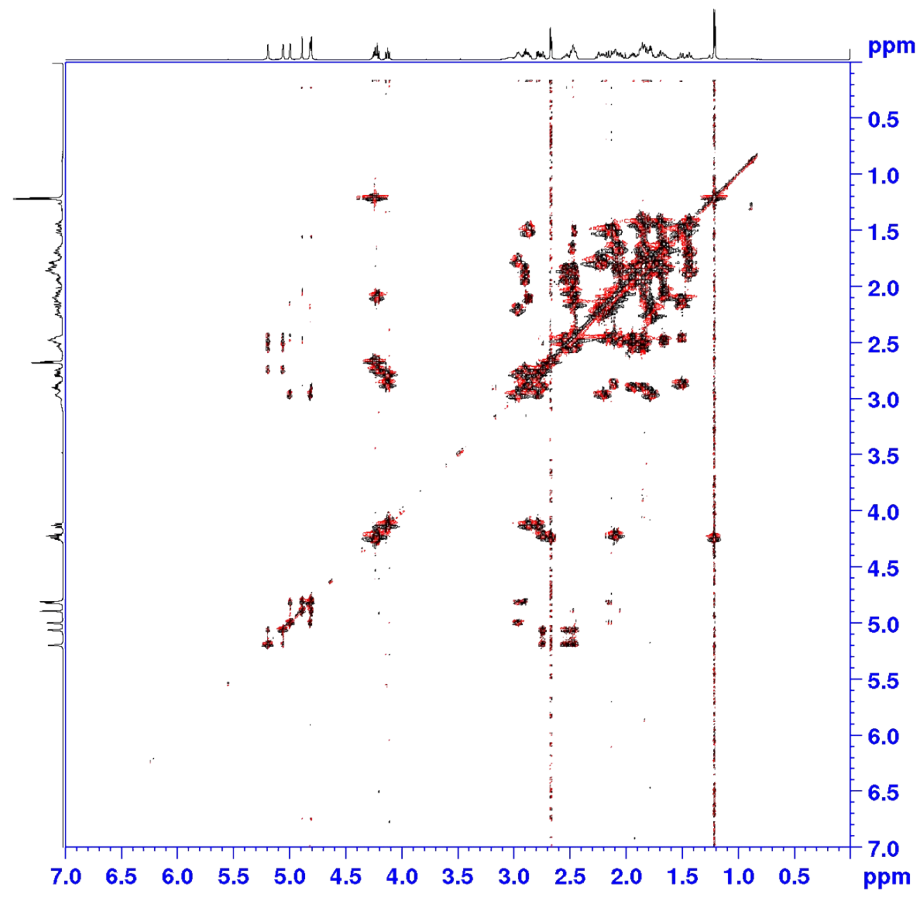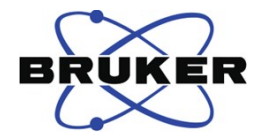

```

Current Data Parameters
NAME      cmx-31 600M
EXPNO    4
PROCNO   1

F2 - Acquisition Parameters
Date_    20170712
Time     22:51
INSTRUM  spect
PROBHD   5 mm PABBO BB-
PULPROG  cosygpmfphpp
TD       3072
SOLVENT  cdcl3
NS       1
DS       16
SWH      4795.396 Hz
FIDRES   1.561001 Hz
AQ       0.3203072 sec
RG       2050
DW       104.267 usec
DE       6.50 usec
TE       299.3 K
D0       0.0000866 sec
D1       1.50000000 sec
D11      0.03000000 sec
D12      0.00002000 sec
D16      0.00020000 sec
IN0      0.00020860 sec

===== CHANNEL f1 =====
SF01    600.1325000 MHz
NUC1    1H
P1      13.70 usec
P2      27.40 usec
P17     2500.00 usec
PLW1    19.34000015 W
PLW10   5.36969995 W

===== GRADIENT CHANNEL =====
GPNAM[1] SMSQ10.100
GPNAM[2] SMSQ10.100
GP21    10.00 %
GP22    20.00 %
P16     1000.00 usec

F1 - Acquisition parameters
TD      512
SF01    600.1325 MHz
FIDRES   18.726030 Hz
SW       7.988 ppm
FmMODE   States-TPPI

F2 - Processing parameters
SI      2048
SF      600.1300107 MHz
WDW     QSINE
SSB     2
LB      0 Hz
GB      0
PC      1.40

F1 - Processing parameters
SI      2048
MC2     States-TPPI
SF      600.1300107 MHz
WDW     QSINE
SSB     2
LB      0 Hz
GB      0
  
```

Figure S9. <sup>1</sup>H-<sup>1</sup>H COSY spectrum of Vlasoulide A (1) in CDCl<sub>3</sub>

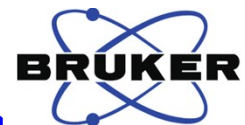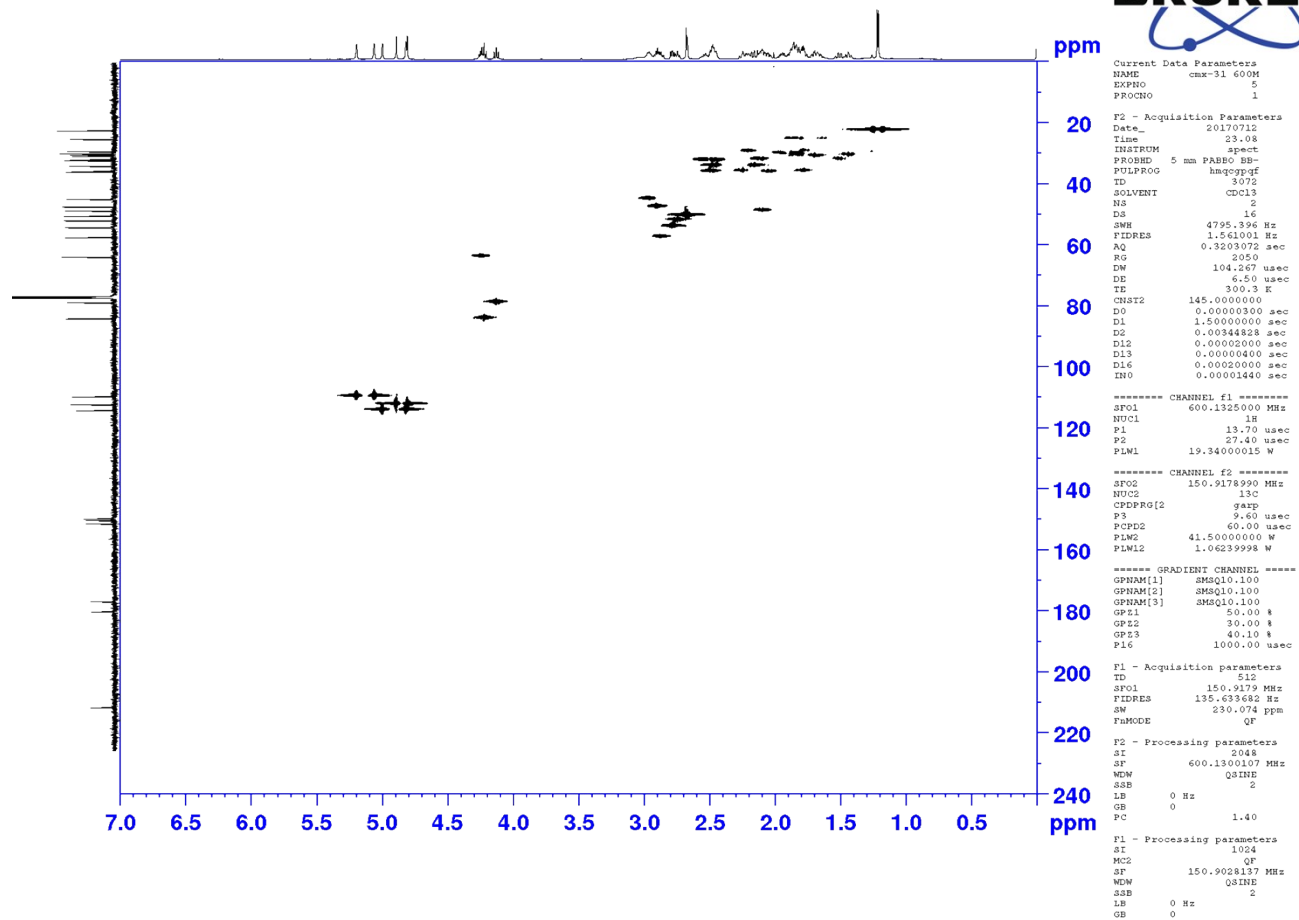

Figure S10. HSQC spectrum of Vlasoulide A (1) in CDCl<sub>3</sub>

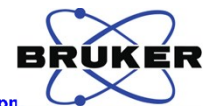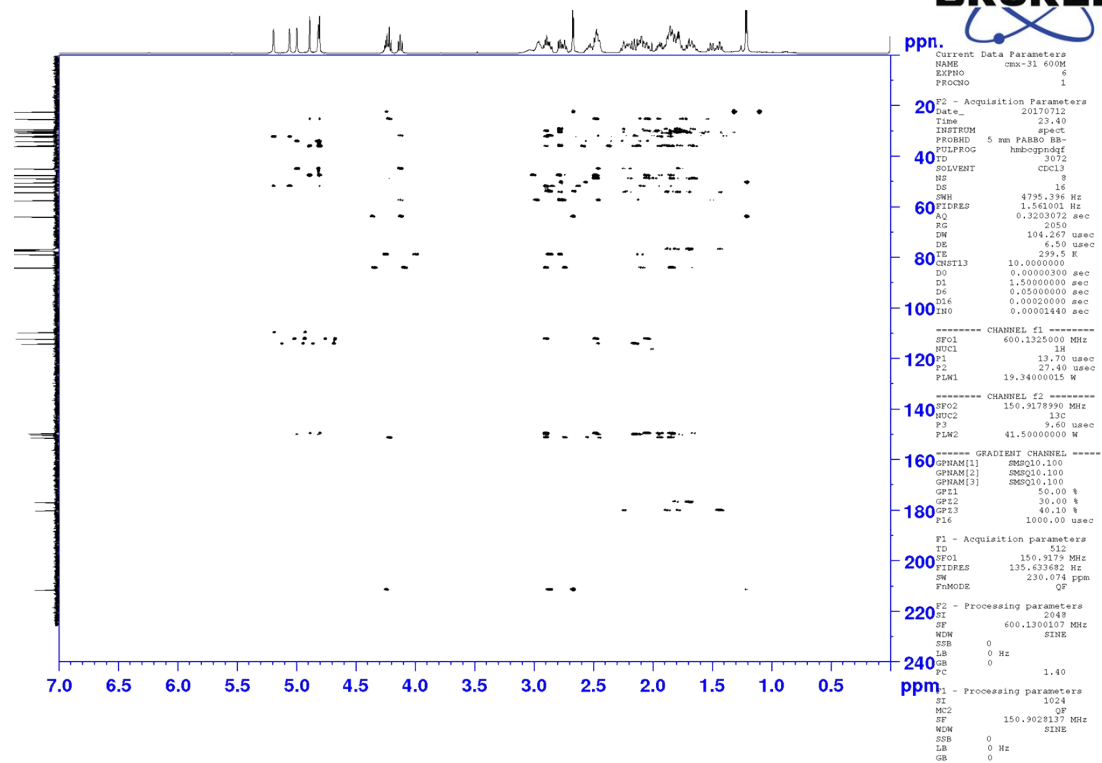

Figure S11. HMBC spectrum of Vlasoulide A (1) in CDCl<sub>3</sub>

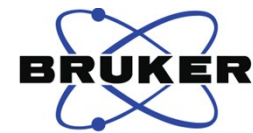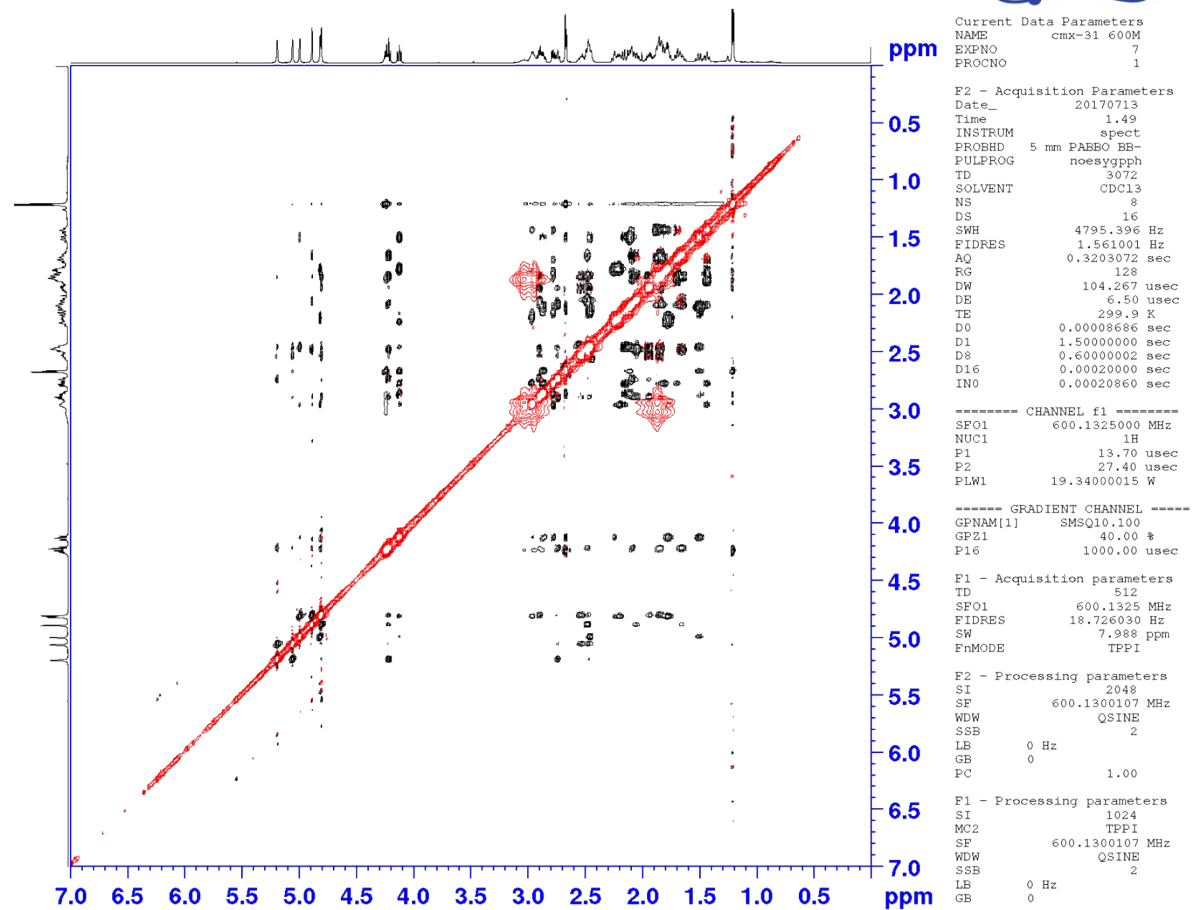

Figure S12. NOESY spectrum of Vlasoulide A (1) in CDCl<sub>3</sub>

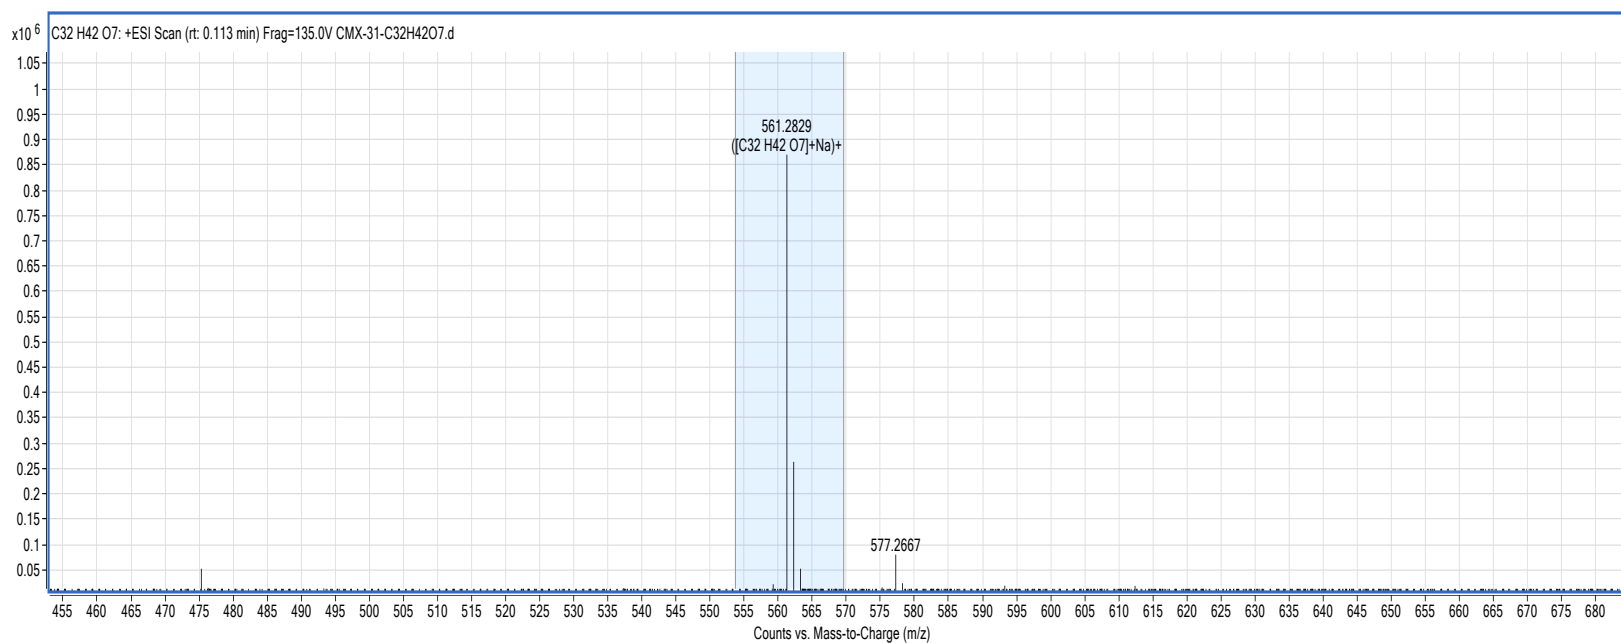

| Height (Calc) | Height Sum% (Calc) | Height % (Calc) | m/z (Calc) | Diff (mDa) | Height   | Height % | Height Sum % | m/z      |
|---------------|--------------------|-----------------|------------|------------|----------|----------|--------------|----------|
| 829908.4      | 70                 | 100             | 561.2823   | -0.6       | 870177.4 | 100      | 73.4         | 561.2829 |

| Species | m/z      | Score (iso. abund) | Score (mass) | Score (MS) | Score (MFG) | Score (iso. spacing) | Height   | Ion Formula   |
|---------|----------|--------------------|--------------|------------|-------------|----------------------|----------|---------------|
| (M+Na)+ | 561.2829 | 88.61              | 98.95        | 96.12      | 96.12       | 99.48                | 870177.4 | C32 H42 Na O7 |

**Figure S13. HRESIMS spectrum of Vlasoulide B (2)**

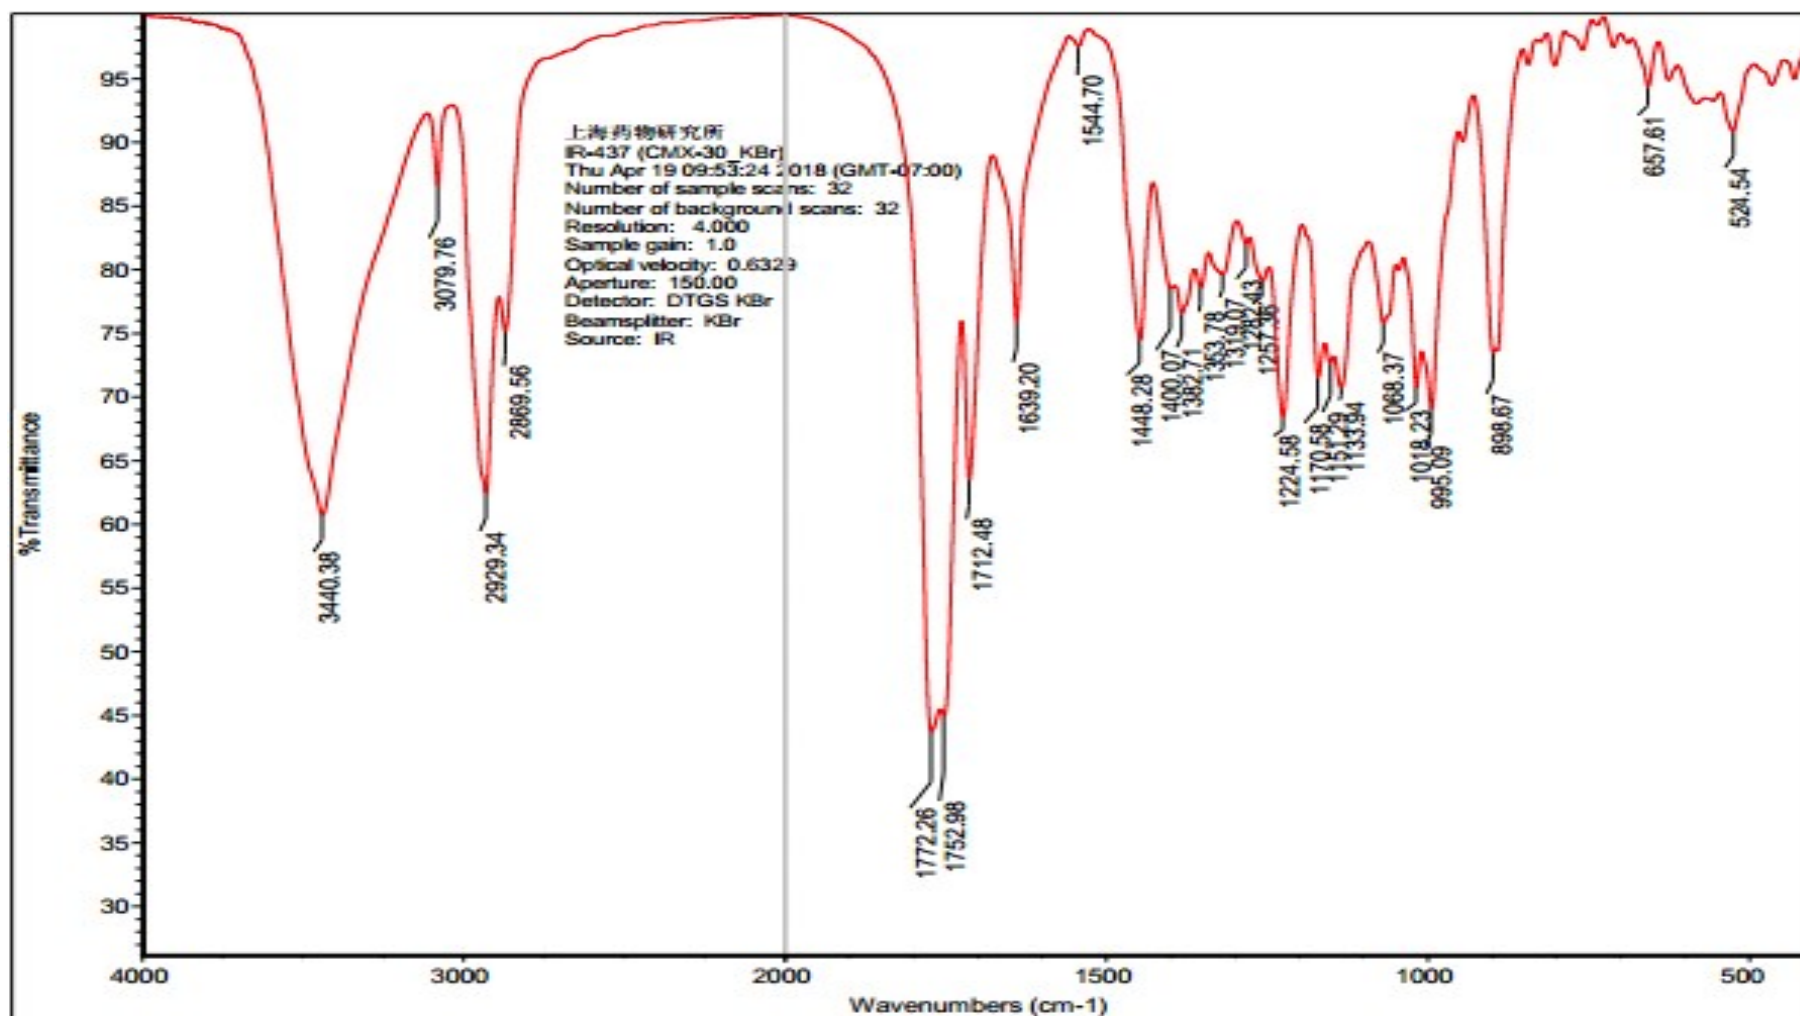

Figure S14. IR spectrum of Vlasoulide B (2)

**Rudolph Research Analytical**

Friday, 04/20/2018

This sample was measured on an Autopol VI, serial number 90079,  
manufactured by Rudolph Research Analytical, Hackettstown, NJ.

LotID : CMX-30  
Set Temperature : 20.0  
Temp Corr : OFF

| n | Average | Std.Dev. | Maximum | Minimum |      |           |             |        |       |          |     |        |       |       |         |
|---|---------|----------|---------|---------|------|-----------|-------------|--------|-------|----------|-----|--------|-------|-------|---------|
| 6 | 0.000   | 0.0000   | 0.000   | 0.000   | S.No | Sample ID | Time        | Result | Scale | OR ° Arc | WLG | Lg.mm  | Conc. | Temp. | Comment |
|   |         |          |         |         | 1    | CMX-30    | 03:58:34 PM | 0.000  | SR    | 0.000    | 589 | 100.00 | 0.080 | 20.2  |         |
|   |         |          |         |         | 2    | CMX-30    | 03:58:43 PM | 0.000  | SR    | 0.000    | 589 | 100.00 | 0.080 | 20.2  |         |
|   |         |          |         |         | 3    | CMX-30    | 03:58:51 PM | 0.000  | SR    | 0.000    | 589 | 100.00 | 0.080 | 20.1  |         |
|   |         |          |         |         | 4    | CMX-30    | 03:58:58 PM | 0.000  | SR    | 0.000    | 589 | 100.00 | 0.080 | 20.1  |         |
|   |         |          |         |         | 5    | CMX-30    | 03:59:06 PM | 0.000  | SR    | 0.000    | 589 | 100.00 | 0.080 | 20.1  |         |
|   |         |          |         |         | 6    | CMX-30    | 03:59:14 PM | 0.000  | SR    | 0.000    | 589 | 100.00 | 0.080 | 20.1  |         |

\_\_\_\_\_  
Signature

**Figure S15. OR Value of Vlasoulide B (2) in CH<sub>3</sub>OH**

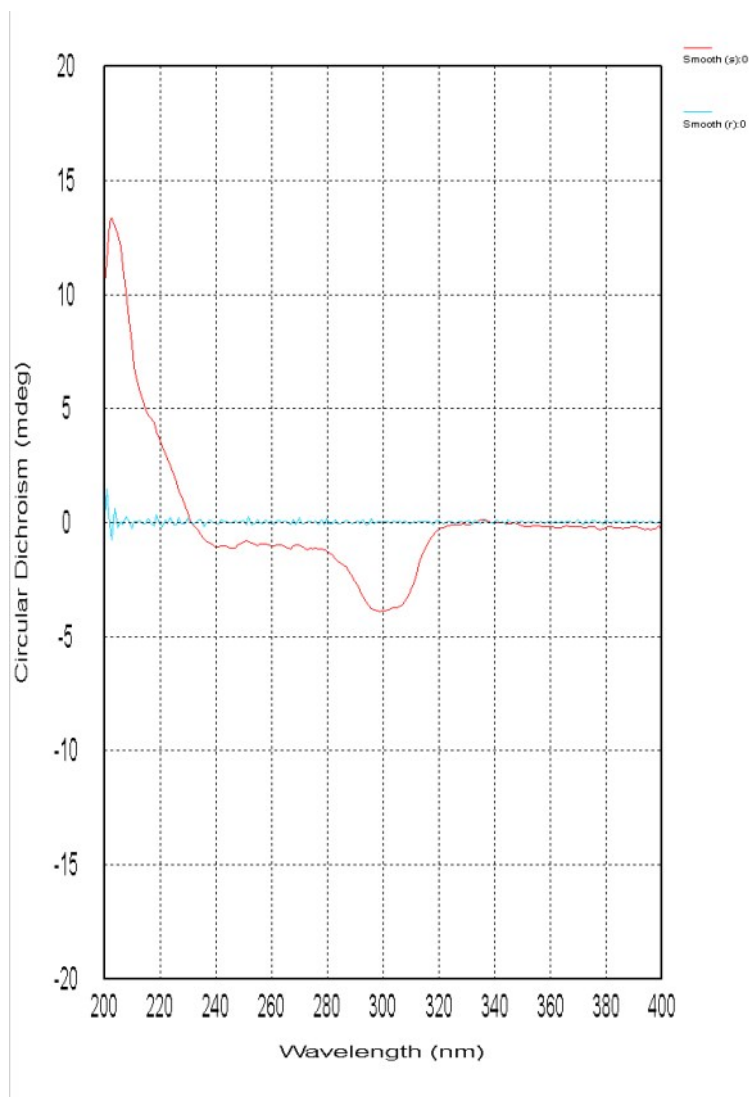

**Figure S16. CD Value of Vlasoulide B (2) in CH<sub>3</sub>OH**



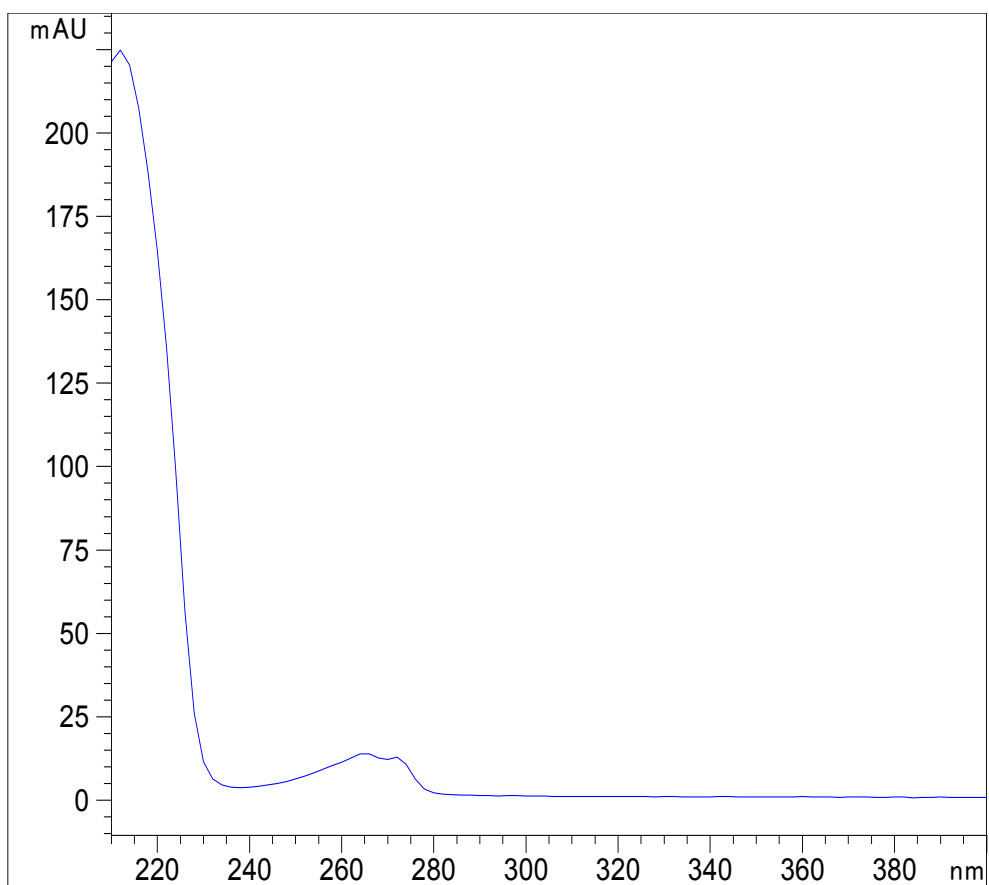

**Figure S17. UV spectrum of Vlasoulide B (2) in CH<sub>3</sub>CN/H<sub>2</sub>O**

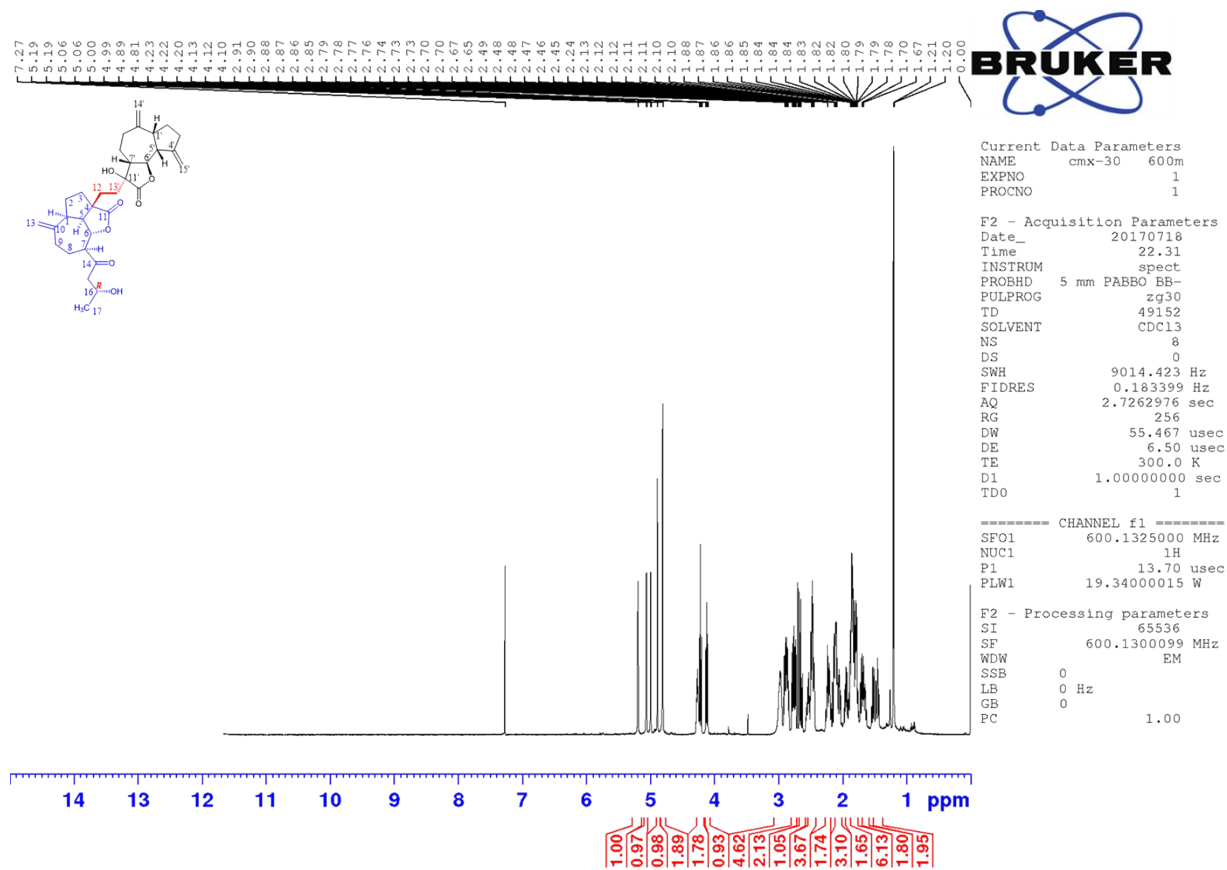

Figure S18. <sup>1</sup>H NMR spectrum of Vlasoulide B (2) in CDCl<sub>3</sub>

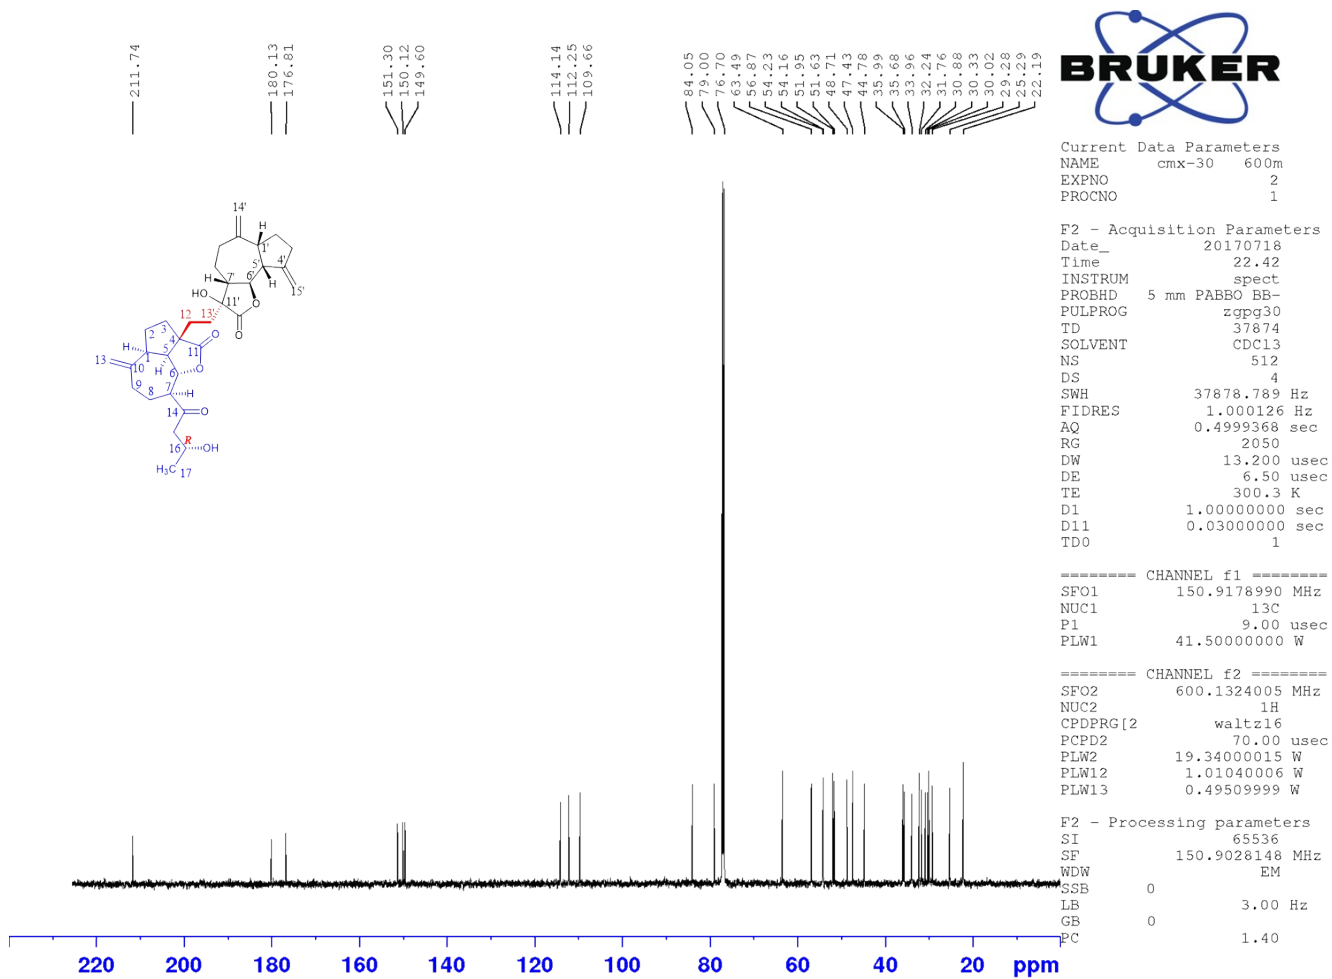

Figure S19.  $^{13}\text{C}$  NMR spectrum of Vlasoulide B (2) in  $\text{CDCl}_3$

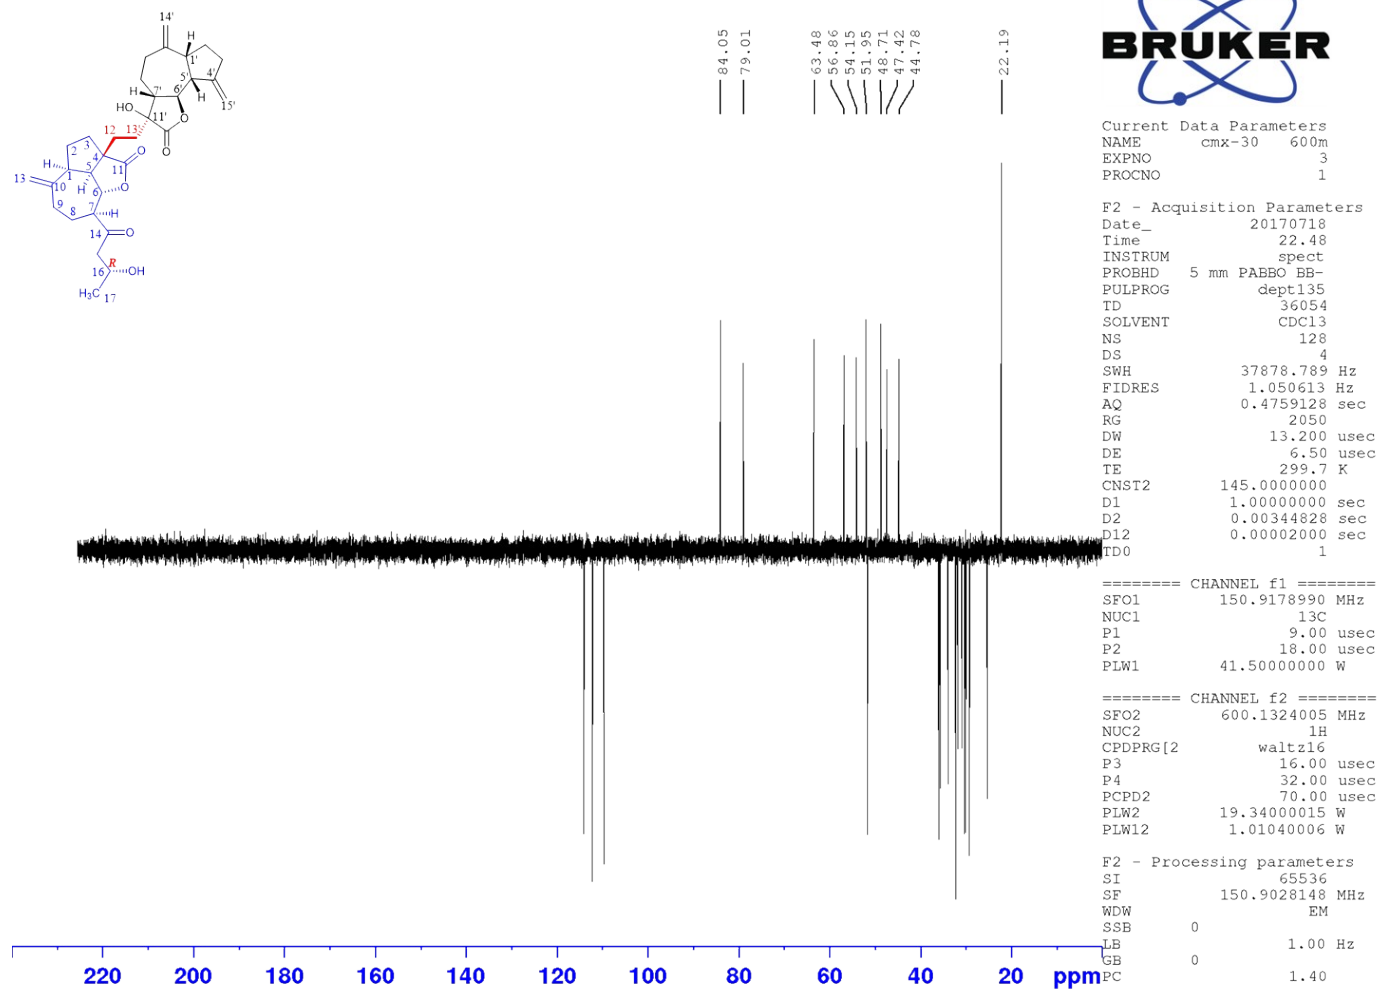

Figure S20. DEPT-135 NMR spectrum of Vlasoulide B (2) in CDCl<sub>3</sub>

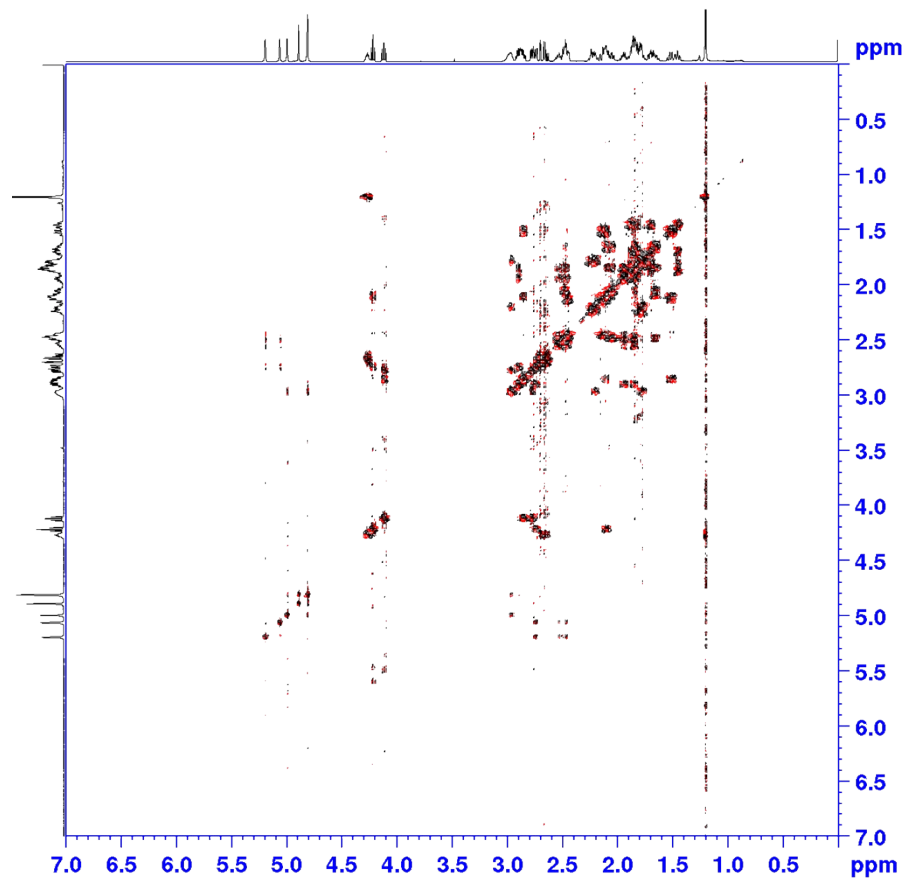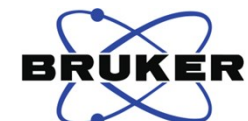

```

NAME_1  CMA-3V  000H
EXPNO   4
PROCNO  1

F2 - Acquisition Parameters
Date_   20170718
Time    22.49
INSTRUM spect
PROBHD  5 mm F4BBO BB-
PULPROG cosygpmfppp
TD      3072
SOLVENT CDCl3
NS      1
DS      16
SWH     4795.396 Hz
FIDRES  1.561001 Hz
AQ      0.3203072 sec
RG      2050
DW      104.267 usec
DE      6.50 usec
TE      299.3 K
DO      0.00008686 sec
D1      1.50000000 sec
D11     0.03000000 sec
D12     0.00020000 sec
D16     0.00020000 sec
IN0     0.00020860 sec

===== CHANNEL f1 =====
SF01   600.1325000 MHz
NUC1    1H
P1     13.70 usec
P2     27.40 usec
P17    2500.00 usec
PLW1   19.34000015 W
PLW10  5.36969995 W

===== GRADIENT CHANNEL =====
GPNAM[1] SMSQ10.100
GPNAM[2] SMSQ10.100
GPZ1    10.00 %
GPZ2    20.00 %
P16     1000.00 usec

F1 - Acquisition parameters
TD      512
SF01    600.1325 MHz
FIDRES  18.726030 Hz
SW      7.988 ppm
FnMODE  States-TFPI

F2 - Processing parameters
SI      2048
SF      600.130099 MHz
WDW     QSINE
SSB     2
LB      0 Hz
GB      0
PC      1.40

F1 - Processing parameters
SI      2048
MC2     States-TFPI
SF      600.130099 MHz
WDW     QSINE
SSB     2
LB      0 Hz
GB      0

```

Figure S21.  $^1\text{H}$ - $^1\text{H}$  COSY spectrum of Vlasoulide B (2) in  $\text{CDCl}_3$

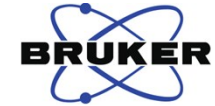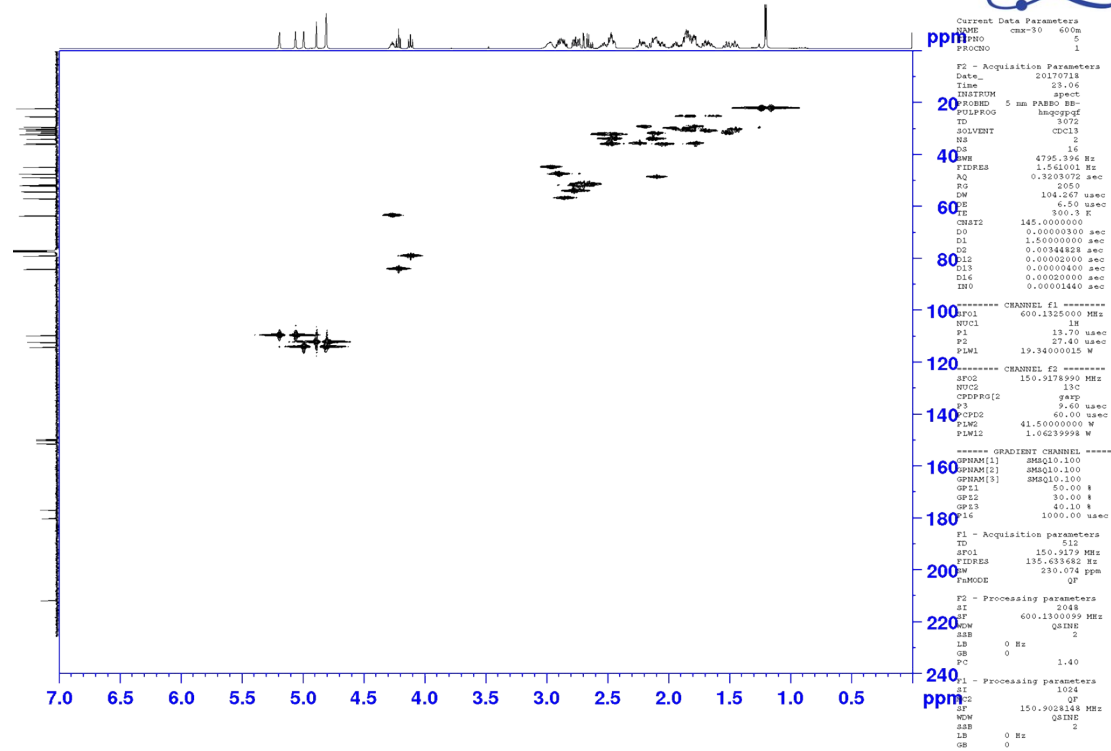

Figure S22. HSQC spectrum of Vlasoulide B (2) in CDCl<sub>3</sub>

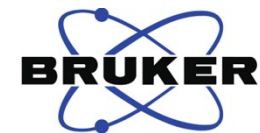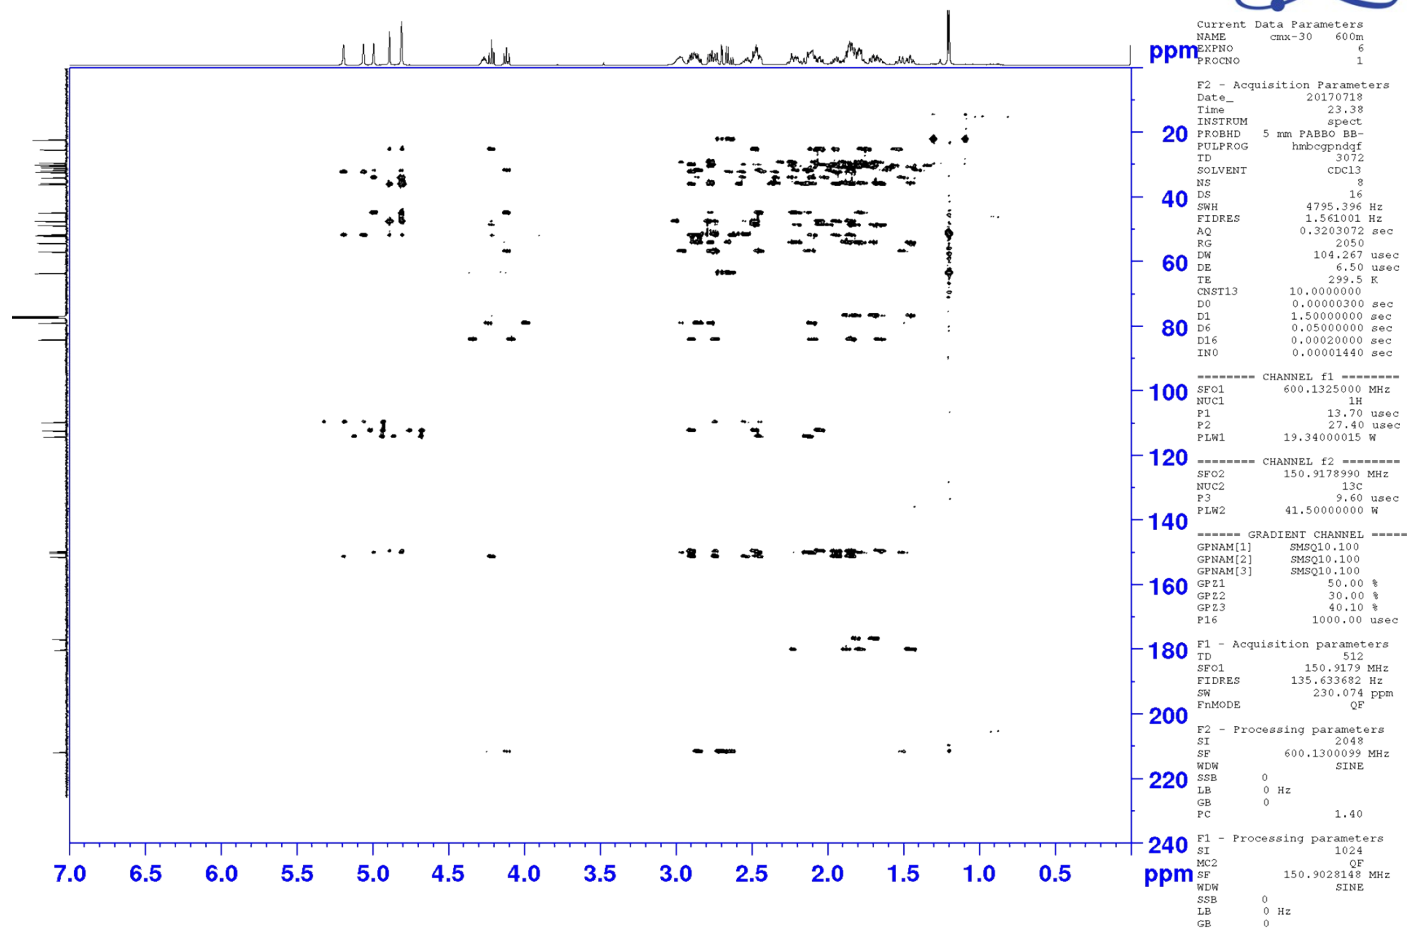

Figure S23. HMBC spectrum of Vlasoulide B (2) in CDCl<sub>3</sub>

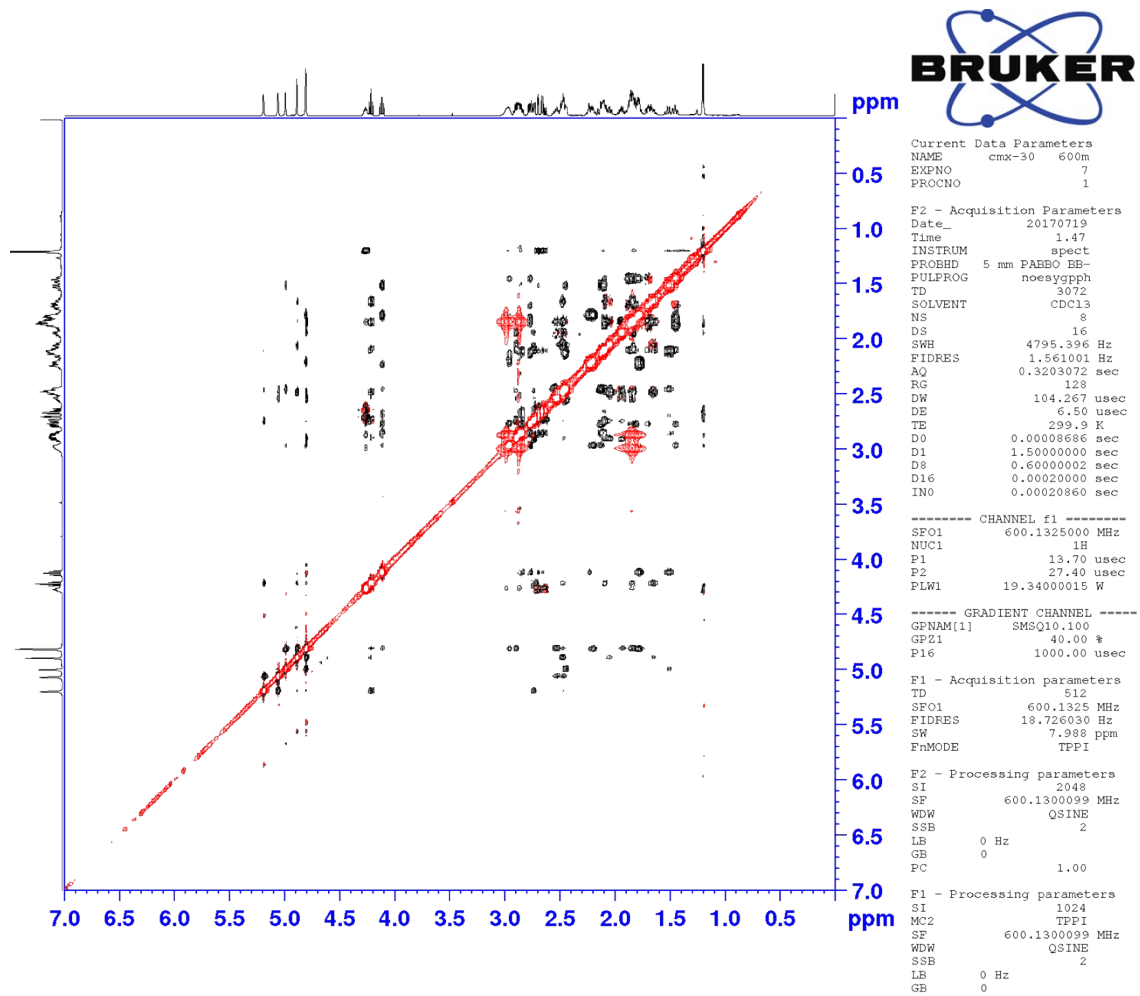

Figure S24. NOESY spectrum of Vlasoulide B (2) in CDCl<sub>3</sub>



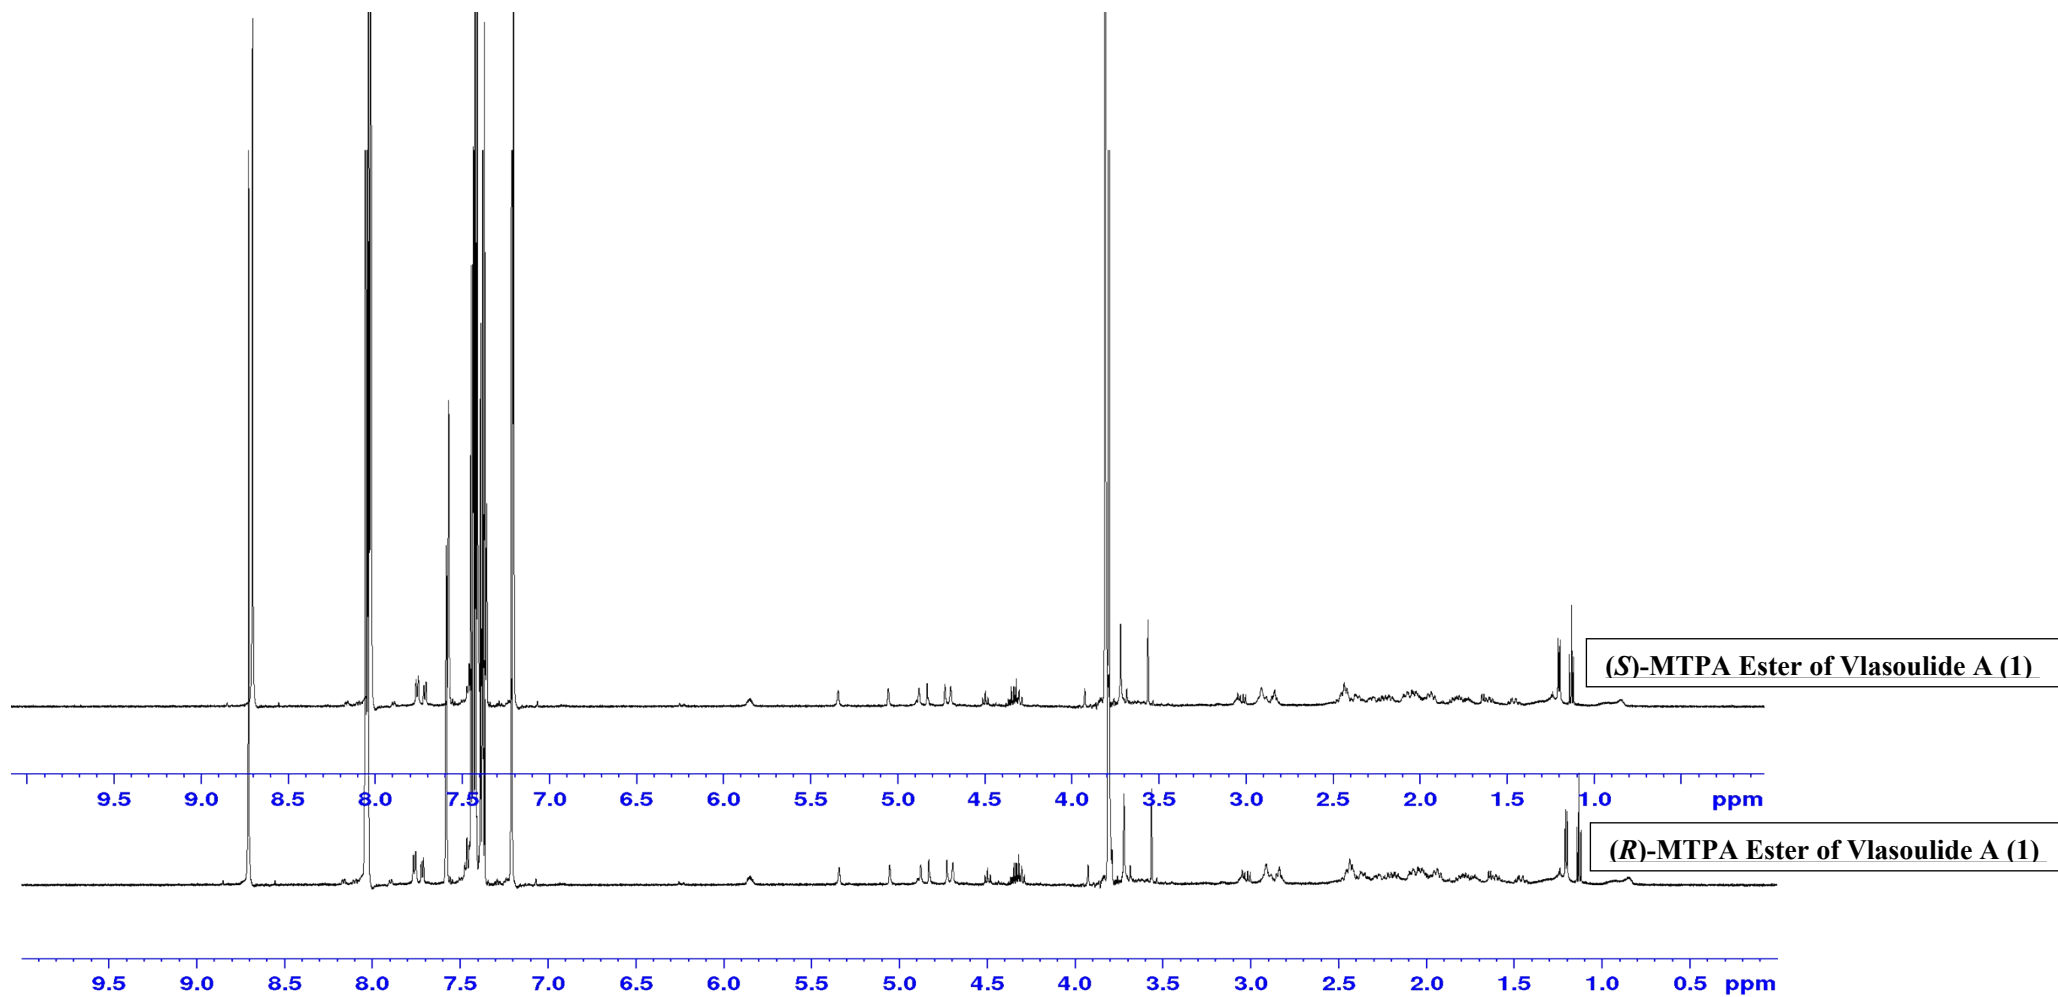

Figure S25. (*R*) and (*S*)-MTPA Esters of Vlasoulide A (1)

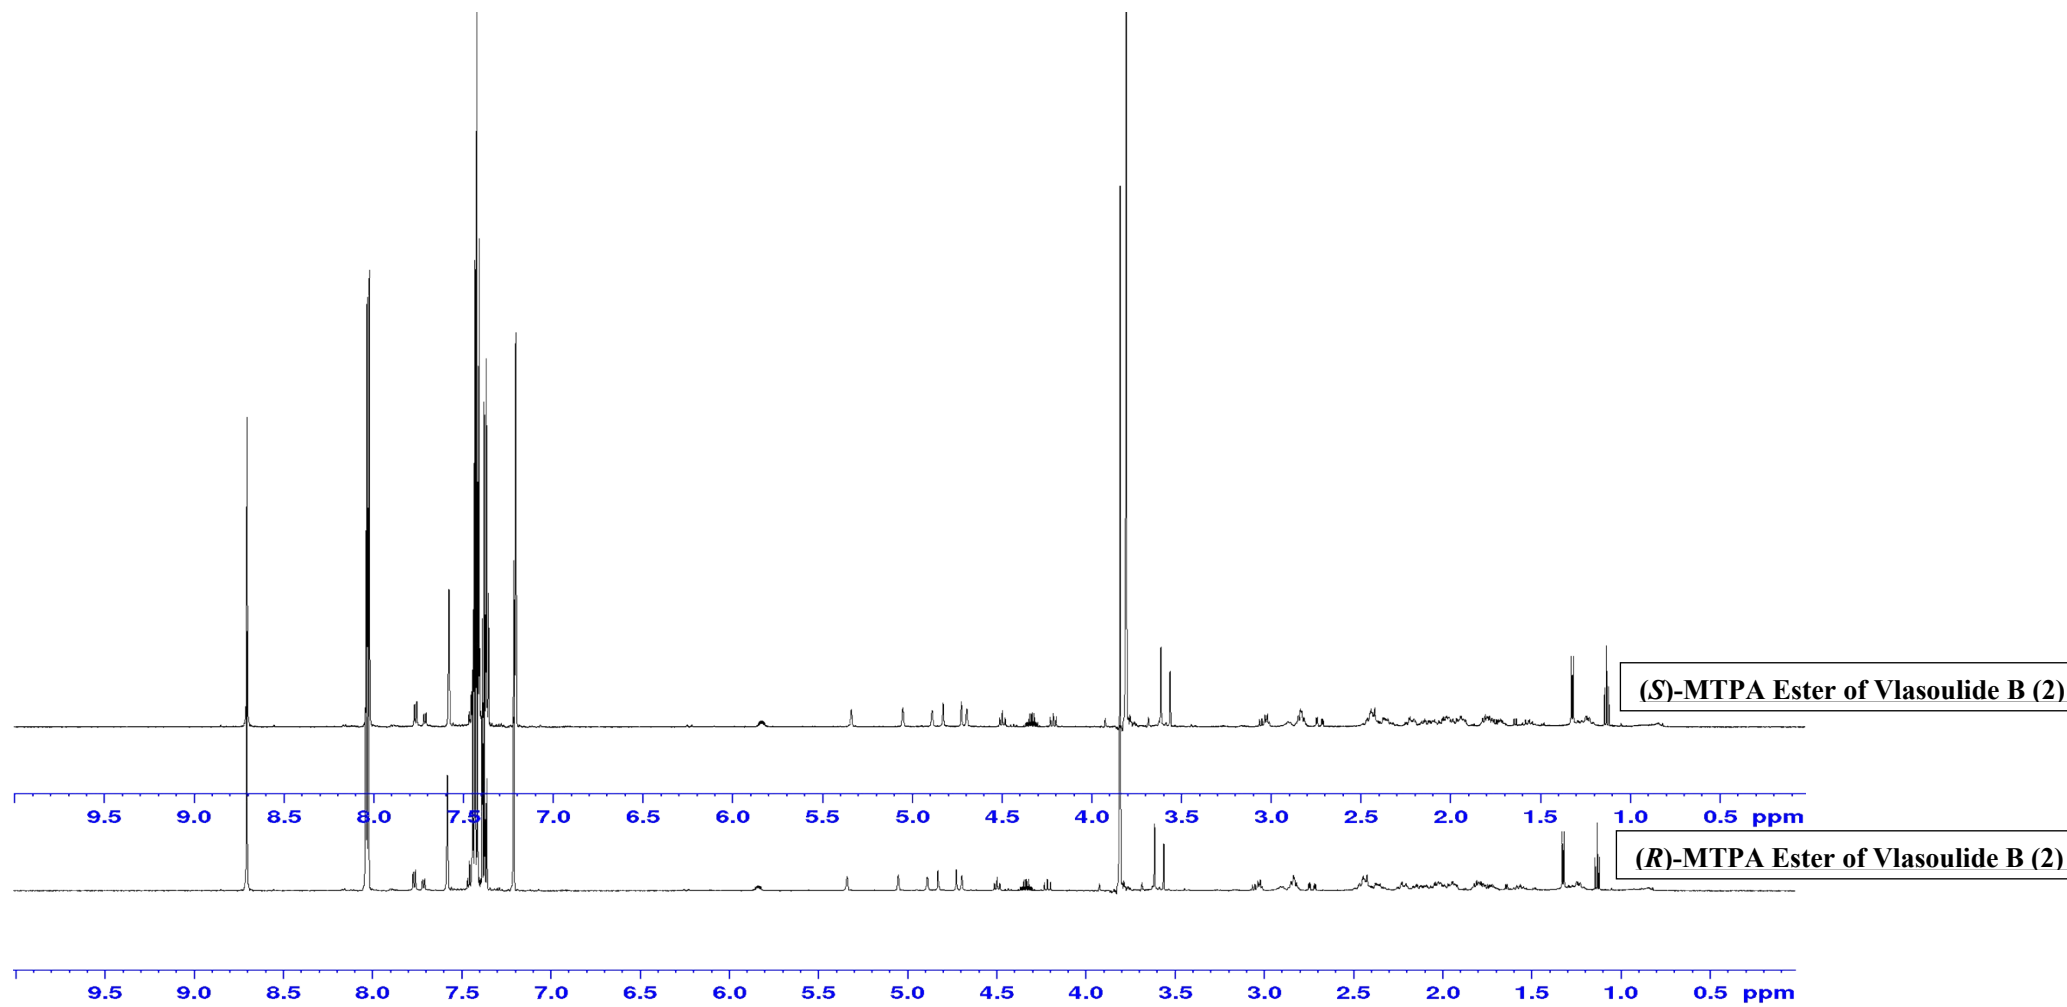

Figure S26. (*R*) and (*S*)-MTPA Esters of Vlasoulide B (2)
